# Supplementary material for: An Image-Processing Tool for Size and Shape Analysis of Manufactured Irregular Polyethylene Microparticles
Source: MDPI journal article supplement (doi:10.3390/microplastics3010008), 2024-02-09
Supplement: s1 [file s1]

# An Image-Processing Tool for Size and Shape Analysis of Manufactured Irregular Polyethylene Microparticles

Melanie Fritz <sup>1,\*</sup>, Lukas F. Deutsch <sup>1</sup>, Karunia Putra Wijaya <sup>2</sup>, Thomas Götz <sup>2</sup> and Christian B. Fischer <sup>1,3,\*</sup>

<sup>1,2</sup> Department of Physics, Faculty of Mathematics and Natural Sciences, University of Koblenz, Universitätsstr. 1, 56070 Koblenz, Germany

<sup>2</sup> Department of Mathematics, Faculty of Mathematics and Natural Sciences, University of Koblenz, Universitätsstr. 1, 56070 Koblenz, Germany

<sup>3</sup> Material Science, Energy and Nano-Engineering Department, Mohammed VI Polytechnic University, Lot 660, Hay Moulay Rachid, Ben Guerir 43150, Morocco

\* Correspondence: fritz.melanie@web.de (M.F.); chrbfischer@uni-koblenz.de (C.B.F.); Tel.: +49-261-287-2345 (C.B.F.)

## List of contents

### Page S2: SI1: Developed scripts

Page S2: **Script S1:** MP\_Analysis\_Particle.m

Page S24: **Script S2:** MP\_Analysis\_Particle\_RGB.m

### Page S47: SI2: Global thresholding versus edge detection

**Figure S1:** Original SEM-image (c), top-hat-filtered and histogram-stretched (d), after *Sobel* edge detection (e) and after *Canny* edge detection (f).

### Page S48: SI3: Evaluation of “best” setting

Page S48: **Figure S2:** Overlay of input and output images of the 1st image series tested, LDPE particles of the sieve fraction 200-300  $\mu\text{m}$  (No. 1-5) and fraction 50-100  $\mu\text{m}$  (No. 6-11) with the two pilot images (No. 1+8, red framed) imaged in MAG 20x (1 mm) and MAG 50x (0.6 mm).

Page S49: **Table S1:** Tested settings on the pilot image of fraction 200-300  $\mu\text{m}$  with MAG 20x.

Page S50: **Table S2:** Tested settings on the pilot image of fraction 50-100  $\mu\text{m}$  with MAG 50x.

Page S51: **Table S3:** Evaluated results using structuring element size 4, morphological closing and segmentation threshold 5.

Page S52: **Table S4:** Evaluated results using structuring element size 4, morphological closing and segmentation threshold 4.

Page S53: **Table S5:** Evaluated results using structuring element size 6, morphological closing and segmentation threshold 5.

Page S54: **Table S6:** Evaluated results using structuring element size 6, morphological closing and segmentation threshold 3.

### Page S55: SI4: Influences of magnification changes

Page S55: **Table S7:** Measurement values of magnification (MAG) compatibility analysis.

### Page S57: SI5: Second image series

Page S57: **Figure S3:** SEM images (No. 1-10) with detected LDPE particles (200-300  $\mu\text{m}$ , red outlined) of 2<sup>nd</sup> series used for PSD analysis.

Page S58: **Figure S4:** SEM images (No. 1-28) with detected particles (red outlined) of 2<sup>nd</sup> series from the batch smaller 300  $\mu\text{m}$  used for shape classification.

Page S59: **Figure S5:** SEM images (No. 1-15) with detected particles (red outlined) of 2<sup>nd</sup> series from the batch smaller 800  $\mu\text{m}$  used for shape analysis.

## SI1: Developed scripts

### Script S1: MP\_Analysis\_Particle.m

The following algorithm was used for the evaluation of the 1<sup>st</sup> series with image format (TIF, resolution: 1406 x 1026 px).

```
%%%Clearing storage%%%
clear all; %clear all variables
##clc; %clear console
close all; %close all figures

%%%Initiatlizing Packages%%%
%Image Package Initialization: Core octave package
pkg load image;
%Computational Geometry Initialization: Requires one-time installation via "pkg install -forge matgeom" in prompt after
downloading here: https://octave.sourceforge.io/download.php?package=matgeom-1.2.2.tar.gz
pkg load matgeom;

%%%Loading Images from folder%%%
[stat,img_idx]=fileattrib("*.tif");
%Number of images, is the length of the indexed vector
img_amount=length(img_idx);
%Helping variable for global shape parameters
length_old=0;
%Helping variable for global size evaluation
length_part_old=0;

%%%Settings%%%
%Select the contrast of the original image. If the background is very light, set bright image value 1
bright_image=0;
%Magnification of image enhancement
mag=20;
%Specify the border of image section to be analyzed in horizontal (x) direction or verical (y) direction
%Assumes, that SEM image labeling is superimposed in the bottom half.
dim_x=1406;
dim_y=1026;
%Select the edge detection method (Set edge_method "1" for Sobel or "2" for Canny or "3" for Thresholding by Otsu)
edge_method=2;
%Select shape analysis by setting the variable "1", otherwise, give it value "0"
shape_option=1;
%Select geometric overlay method by setting variable "1", otherwise give it different value
shape_geometry=0;
%Select value "1", if shape analysis statistics for single images are wanted, set it "0" otherwise
```

```

single_image_shape=0;
%Initialization of structuring elements
SE_tophat=strel("disk",10,0); %Structuring Element for top-hat Transformation
SE_close=strel("disk",4,0); %Structuring Element for closing after edge detection
SE_bound=strel("disk",3,0); %Thickness of the boundary
%Threshold value for the height of H-max transform
height_th=5;
%Select the value of the LDPE particle sample. It is found in the status bar of SEM images
LDPE=1.4;

switch(LDPE)
%Calculate the minimum and maximum sieve diameter in  $\mu\text{m}$  depending on sieve identifier
case{1.1}
    sieve_min=0;
    sieve_max=500;
case{1.2}
    sieve_min=400;
    sieve_max=500;
case{1.3}
    sieve_min=300;
    sieve_max=400;
case{1.4}
    sieve_min=200;
    sieve_max=300;
case{1.5}
    sieve_min=150;
    sieve_max=200;
case{1.6}
    sieve_min=125;
    sieve_max=150;
case{1.7}
    sieve_min=100;
    sieve_max=125;
case{1.8}
    sieve_min=50;
    sieve_max=100;
case{2.1}
    sieve_min=0;
    sieve_max=300;
case{2.2}
    sieve_min=200;
    sieve_max=300;
case{2.3}
    sieve_min=150;

```

```

sieve_max=200;
case{2.4}
sieve_min=125;
sieve_max=150;
case{2.5}
sieve_min=100;
sieve_max=125;
case{2.6}
sieve_min=50;
sieve_max=100;
case{2.7}
sieve_min=25;
sieve_max=50;
endswitch

%%%Image Analysis%%%
for k=1:img_amount
    %%Selecting and cropping Image
    img_in=imread(img_idx(k).Name,"PixelRegion",[1 dim_y],[1 dim_x]);

    %%TopHat-Filtering
    img_tophat_gray=imtophat(img_in,SE_tophat);
    img_tophat=im2double(img_tophat_gray);
    ## img_tophat=imtophat(img_in,SE_tophat);
    ## figure, imhist(img_tophat), axis "auto y";
    img_adj=imadjust(img_tophat);
    ## img_adj=imadjust(img_tophat,[0.001;0.2], [0.5;1],1);
    ## figure, imhist(img_adj), axis "auto y";
    ## figure, imshow(img_adj);

    %%Edge-Finding
    switch(edge_method)
    case{1}
        %Sobel Edge-Finding algorithm
        img_edge=edge(img_adj,"Sobel");
        ## figure,subplot(121),imshow(img_adj),subplot(122),imshow(img_edge);
    case{2}
        %Calculating the threshold via Otsu's method
        thresh=graythresh(img_adj);
        %Canny Edge-Finding algorithm
        img_edge=edge(img_adj,"Canny",0.5*thresh);
        ## figure, imshow(img_edge);
        ## figure,subplot(121),imshow(img_adj),subplot(122),imshow(img_edge);
    case{3}

```



```

img_edge=im2bw(img_adj,graythresh(img_adj));
## figure, imshow(img_edge);
otherwise
    printf("Please enter a valid value for the Edge-Finding method or define another one in the code using your selected value under
the variable edge_method");
endswitch

%%Closing holes on the edges
img_closed=imclose(img_edge,SE_close);
## figure, subplot(121), imshow(img_edge), subplot(122), imshow(img_closed);

%%Flood filling the enclosed areas. Filling before the watershed can lead to issues with particle agglomerates
img_filled=imfill(img_closed,"holes");
## figure, imshow(img_filled);
## figure, subplot(121), imshow(img_closed), subplot(122), imshow(img_filled);

%%Calculate the minimum size of particles considered for morphology depending on sieve size
switch(mag)
% 80 percent of all particles evaluated possess an fitted ellipse reciprocal aspect ratio (rar) of 1/2 or higher, which is used to define
upper thresholds
case{20}
    %Min size particles have circular cross section the size of the sieve opening
## th_min_metric=pi*(sieve_min/2)^2;
    th_min_metric=1.05*sieve_min^2;
    %Max size particles possess circular cross sections with cylindric shape and rar 1/3
    th_max_metric=pi*3/4*sieve_max^2;
    %Convert from metric to px size thresholds
    th_min_px=((188/1000)^2)*th_min_metric;
    th_max_px=((188/1000)^2)*th_max_metric;
case{50}
    %Min size particles have circular cross section the size of the sieve opening
    th_min_metric=1.05*sieve_min^2;
    %Max size particles have elliptical cross sections with rar 1/3, resulting in rectangles on the image
    th_max_metric=pi*3/4*sieve_max^2;
    %Convert from metric to px size thresholds
    th_min_px=((281/600)^2)*th_min_metric;
    th_max_px=((281/600)^2)*th_max_metric;
case{110}
    %Min size particles have circular cross section the size of the sieve opening
    th_min_metric=1.05*sieve_min^2;
    %Max size particles have elliptical cross sections with rar 1/3, with minor axis being the size of the cross section
    th_max_metric=pi*3/4*sieve_max^2;
    %Convert from metric to px size thresholds
    th_min_px=((309/300)^2)*th_min_metric;

```

```

th_max_px=((309/300)^2)*th_max_metric;
endswitch

%%Removal of small particles/noise(2nd argument in bwareaopen enotes the boundary in px2
img_clear1=bwareaopen(img_filled,th_min_px,4);
## figure,imshow(img_clear1);

%%Watershed iteration
%Calculates the Negative of the inverse of the binary image created by edge detection, filling and noise removal
ditmap=bwdist(~img_clear1);
## distmap_img=distmap./(max(max(ditmap)));
## figure, imshow(ditmap_img);
img_marker = imextendedmax(ditmap,height_th,4);
## mask2 = imextendedmin(ditmap,4,4);
## figure,imshow(img_marker);
%Imimposemin makes sure only regional minima at non zero pixels of mask
minima = imimposemin(-ditmap,img_marker);
img_ridgelines = watershed(minima);
## figure, imshow(img_ridgelines);
img_shed=img_clear1;
%The preprocessed image is getting shed in the places, where L has value 0
img_shed(img_ridgelines == 0) = 0;
## figure,imshow(img_shed);

%%Clearing the particles touching the borders(earlier application leads to removal of overlapping objects)
img_clear=imclearborder(img_shed,4);
## figure, imshow(img_clear);

%Codepart for troubleshooting of filter model assumptions
## img_bound_help=im2bw(img_clear-imerode(img_clear,SE_bound));
#### figure, imshow(img_bound_help);
## img_overlay_help=img_in;
## if bright_image==1
## img_overlay_help(img_bound_help==1)=0;
## figure, imshow(img_overlay_help);
## else
## img_overlay_help(img_bound_help==1)=255;
## figure, imshow(img_overlay_help);
## end

%%Application of sieve-fraction sensitive size filtering
%Remove particles belonging in a smaller sieve fraction and oversegmented particles
img_clear2=bwareaopen(img_clear,th_min_px,4);

```

```

## figure, imshow(img_clear2);
    %Retain particle agglomerations and particles belonging to a larger sieve fraction
    img_clear3=bwareaopen(img_clear,th_max_px,4);
## figure, imshow(img_clear3);
    %Retain only particles which belong in the selected sieve fraction
    img_clear4=im2bw(img_clear2-img_clear3);
## figure, imshow(img_clear4);

    %%Calculating the boundary of the particles
    img_bound=im2bw(img_clear4-imerode(img_clear4,SE_bound));
## figure, imshow(img_bound);

    %%Superimpose the boundary of the particles on top of the original image
    img_overlay=img_in;
    if bright_image==1
        img_overlay(img_bound==1)=0;
## figure, imshow(img_overlay);
## figure, subplot(121), imshow(img_filled), subplot(122), imshow(img_overlay);
    else
        img_overlay(img_bound==1)=255;
## figure, imshow(img_overlay);
## figure, subplot(121), imshow(img_filled), subplot(122), imshow(img_overlay);
    end

    %%Generating statistics
    switch(shape_option)
    case{0}
        stats = regionprops(img_clear4,"all");
        sizeA = [stats.Area]; %size of regions in px2
        num_regions = length(stats); %number of regions

    case{1}
        stats = regionprops(img_clear4,"all");
        sizeA = [stats.Area]; %size of regions in px2
        majX = [stats.MajorAxisLength]; %length of the major axis of fitted ellipse
        minX = [stats.MinorAxisLength]; %length of the minor axis of fitted ellipse
        num_regions = length(stats); %number of regions

    %%Iteration that calculates the Max-Feret-Diameter and Bounding-Box of each particle by using the convex hull. Brute force
    bb_area = zeros(1,num_regions); %Vector that contains the Bounding-Box size for each particle
    maxferetdiam = zeros(1,num_regions); %Vector that contains the Max Feret Diameter for each particle
    for i=1:num_regions
        bb_info = stats(i).BoundingBox; %Read out the Bounding-Box info for the i-th particle
        bb_area(i) = bb_info(3)*bb_info(4); %Multiply the length with the width of the bounding box
    end

```

```

particle_convexhull = stats(i).ConvexHull; %Read out the convex hull coordinates of the i-th particle
dist_vert = distancePoints(particle_convexhull, particle_convexhull); %Calculate the euclidian distance in px for each vertex of
the convex hull of the i-th particle
maxferetdiam(i) = max(max(dist_vert)); %Write the maximum entry of the distance Matrix for the i-th particle into the
corresponding vector
endfor

%%Calculating shape parameters
%(reciprocal axis ratio RAR)
rar = minX./majX;
%(rectangularity RTY)
rty = sizeA./bb_area;
%(feret major axis ratio FMR)
fmr = maxferetdiam./majX;

if shape_geometry == 1
%%Shape analysis
num_tri=num_ell=num_rec=num_und=zeros(1,num_regions);
num_total=zeros(1,4); %Vector that's utilized to save the total count of all shapes identified
for j=1:num_regions
if (rty(j) <= 0.6 && fmr(j) >= 1.27)
num_tri(j)=1;
else
num_ell(j)=0;
endif
if ((rar(j) >= 0.98 && rty(j) >= 0.98) || (rar(j) >= 0.97 && fmr(j) >= 1.2) || (rar(j) < 0.98 && rty(j) >= 0.98) || (fmr(j) < 0.98 || fmr(j) >
1.09))
num_rec(j)=1;
else
num_ell(j)=0;
endif
if ((rar(j) >= 0.99 && (fmr(j) > 0.995 && fmr(j) <= 1.15)) || (fmr(j) >= 0.98 && fmr(j) <= 1.09))
num_ell(j)=1;
else
num_ell(j)=0;
endif
%If Shape parameters overlap and don't allow clear identification, a particle is classified as undecided/inconclusive
if ((num_tri(j)==1 && num_rec(j)==1) || (num_tri(j)==1&&num_ell(j)==1) || (num_rec(j)==1&&num_ell(j)==1))
num_tri(j)=num_rec(j)=num_ell(j)=0;
num_und(j)=1;
endif
endfor
num_total(1)=sum(num_ell);
num_total(2)=sum(num_rec);

```

```

num_total(3)=sum(num_tri);
num_total(4)=sum(num_und);

%%Histogram for particle shape distribution
figure
bar(num_total,'FaceColor','r','EdgeColor','k','LineWidth',2,'hist');
xlabel('Shape');
ylabel('Count');
xticks(1:4);
xticklabels(['Ellipse','Rectangle','Triangle','Inconclusive']);
name_shape_hist=sprintf(['picture_',num2str(mag),'_',num2str(k),'_shape_histogram','.png']);
saveas(1,name_shape_hist);
close all;

%%Superimpose the detected ellipse or rectangle over the outline of the detected particle
figure
imshow(img_bound)

t = linspace(0,2*pi,100);
hold on
for i = 1:num_regions
    if (num_ell(i)==1)
        a = stats(i).MajorAxisLength/2;
        b = stats(i).MinorAxisLength/2;
        Xc = stats(i).Centroid(1);
        Yc = stats(i).Centroid(2);
        phi = deg2rad(-stats(i).Orientation);
        x = Xc + a*cos(t)*cos(phi) - b*sin(t)*sin(phi);
        y = Yc + a*cos(t)*sin(phi) + b*sin(t)*cos(phi);
        plot(x,y,'r','LineWidth',0.5)
    endif
    if (num_rec(i)==1)
        le = stats(i).MajorAxisLength/2*0.886227;
        wi = stats(i).MinorAxisLength/2*0.886227;
        Xc = stats(i).Centroid(1);
        Yc = stats(i).Centroid(2);
        center = transpose(stats(i).Centroid);
        theta = deg2rad(stats(i).Orientation);
        coords = [Xc-le Xc-le Xc+le Xc+le;...
                  Yc-wi Yc+wi Yc+wi Yc-wi];
        R = [cos(theta) sin(theta);...
              -sin(theta) cos(theta)];
        rot_coords = R*(coords-repmat(center,[1 4]))+repmat(center,[1 4]);
        rot_coords(:,5)=rot_coords(:,1);

```

```

        line(rot_coords(1,:),rot_coords(2,:), 'color','g','LineWidth',0.5);
    endif
endfor
name_overlay_shape=sprintf(['picture_',num2str(mag),'_',num2str(k),'_shape_overlay','png']);
saveas(1,name_overlay_shape);
hold off

close all;
endif

%%Calculating Convexity and Solidity of the particle to describe deviation from a convex cross section
solidity_particle=convexity_particle=perim_cvxpoly=zeros(1,num_regions);
for i=1:num_regions
    solidity_particle(i)=stats(i).Solidity;
    perim_cvxpoly(i)=polygonLength(stats(i).ConvexHull);
    convexity_particle(i)=perim_cvxpoly(i)./stats(i).Perimeter;
endfor

%%Global shape parameter distribution
if length_old==0
    rar_out=rar;
    fmr_out=fmr;
    cvx_out=convexity_particle;
    sol_out=solidity_particle;
    length_old=num_regions;
else
    %Save prior shape parameters in help array
    rar_old=rar_out;
    fmr_old=fmr_out;
    cvx_old=cvx_out;
    sol_old=sol_out;

    %Determine length of new shape parameter array
    length_new=length_old+num_regions;

    %Initialize new output arrays
    rar_out=fmr_out=sol_out=cvx_out=zeros(1,length_new);
    for i=1:length_old
        rar_out(i)=rar_old(i);
        fmr_out(i)=fmr_old(i);
        sol_out(i)=sol_old(i);
        cvx_out(i)=cvx_old(i);
    endfor
    for i=(length_old+1):(length_new)
        rar_out(i)=rar(i-length_old);
        fmr_out(i)=fmr(i-length_old);
    endfor
endfor

```

```

    sol_out(i)=solidity_particle(i-length_old);
    cvx_out(i)=convexity_particle(i-length_old);
endfor
length_old=length(cvx_out);
end

%%Plotting Convexity and Solidity
if single_image_shape==1
    [count_solid,bincenter_solid]=hist(solidity_particle,3);
    figure
    bar(bincenter_solid,count_solid,'FaceColor','r','EdgeColor','k','LineWidth',2,"hist");
    xlabel('Solidity A_{Particle}/A_{Convexhull}');
    ylabel ('Count');
    name_hist_solidity=sprintf(['picture_',num2str(mag),'_',num2str(k),'_solidity_histogram','.png']);
    saveas(1,name_hist_solidity);
    close all;

    [count_convex,bincenter_convex]=hist(convexity_particle,3);
    figure
    bar(bincenter_convex,count_convex,'FaceColor','r','EdgeColor','k','LineWidth',2,"hist");
    xlabel('Convexity P_{Convexhull}/P_{Particle}');
    ylabel ('Count');
    name_hist_convexity=sprintf(['picture_',num2str(mag),'_',num2str(k),'_convexity_histogram','.png']);
    saveas(1,name_hist_convexity);
    close all;
endif

otherwise
    printf("The currently selected value for shape_option is not implemented. Please redo with supported shape_option values or
add a new case");
endswitch

%%The following section calculates corresponding metric areas in [ $\mu\text{m}^2$ ] from digital unit in [ $\text{px}^2$ ]
%%Tutorial for adding new magnification levels: Copy a case, select the desired magnification level
%%in the argument of case{}. Afterwards use GIMP or a comparable software to measure the distance scale
%%in px. Measure from the left pixel of the left border of the left end towards the left border of the
%%right end. The "Zähler" of the fraction of the variable sizeA_metric describes the length of the scale in
%% $[\mu\text{m}]$ , the "Nenner" contains the measured length of the scale as described above in [px]

%%Hier werden zusammenhängende Pixelflächen[ $\text{px}^2$ ] in metrische Flächen [ $\mu\text{m}^2$ ] umgewandelt.
%%Zur Erweiterung einen case kopieren, die gewünschte Vergrößerung angeben und mit
%%Bildbearbeitungssoftware (z.B. Gimp) mit Lineal-Funktion die Skala zwischen den jeweils linken Balkenenden vermessen.
%%Der Zähler des Bruchs in sizeA_metric beschreibt die Skalalänge in  $\mu\text{m}$ , der Nenner die Pixelanzahl.

```

```

switch(mag)
case{110}
    sizeA_metric=((300/309)^2)*sizeA;
    maxparticle=max(sizeA_metric);
    [count,bincenter]=hist(sizeA_metric,5);
    figure
    bar(bincenter,count,'FaceColor','r','EdgeColor','k','LineWidth',2,"hist");
    xlabel('Area [ $\mu\text{m}^2$ ]');
    ylabel('Particles');
    name_hist=sprintf(['picture_',num2str(mag),'_',num2str(k),'_size_histogram','.png']);
    saveas(1,name_hist);
    close all;

%%Global size statistics generation
%First image
if length_part_old==0
    size_out=sizeA_metric;
    length_part_old=num_regions;
%Subsequent images
else
    %Save prior particle sizes in help array
    size_old=size_out;
    %Determine length of the new size output array
    length_part_new=length_part_old+num_regions;
    size_out=zeros(1,length_part_new);
    for i=1:length_part_old
        %Save old particle sizes in new array
        size_out(i)=size_old(i);
    endfor
    for i=(length_part_old+1):(length_part_new)
        %Add particle sizes from current image
        size_out(i)=sizeA_metric(i-length_part_old);
    endfor
    %Adjust the length of the array required to save the particle sizes
    length_part_old=length(size_out);
end

if single_image_shape==1
    %Histogram for shape specific subplots
    sizeA_ell=zeros(1,num_total(1));
    sizeA_rec=zeros(1,num_total(2));
    sizeA_tri=zeros(1,num_total(3));
    sizeA_und=zeros(1,num_total(4));
    m=n=o=p=1;

```



```

for i=1:num_regions
    if num_ell(i)==1
        sizeA_ell(m)=sizeA_metric(i);
        m++;
    endif
    if num_rec(i)==1
        sizeA_rec(n)=sizeA_metric(i);
        n++;
    endif
    if num_tri(i)==1
        sizeA_tri(o)=sizeA_metric(i);
        o++;
    endif
    if num_und(i)==1
        sizeA_und(p)=sizeA_metric(i);
        p++;
    endif
endfor

if num_total(1) ~= 0
    [cnt_ell,center_ell]=hist(sizeA_ell,3);
    figure
    bar(center_ell,cnt_ell,'FaceColor','r','EdgeColor','k','LineWidth',2,"hist");
    xlabel('Area [ $\mu\text{m}^2$ ]');
    ylabel ('Particles');
    name_hist_ell=sprintf(['picture_',num2str(mag),'_',num2str(k),'_size_histogram_ellipse','.png']);
    saveas(1,name_hist_ell);
    close all;
endif

if num_total(2) ~= 0
    [cnt_rec,center_rec]=hist(sizeA_rec,3);
    figure
    bar(center_rec,cnt_rec,'FaceColor','r','EdgeColor','k','LineWidth',2,"hist");
    xlabel('Area [ $\mu\text{m}^2$ ]');
    ylabel ('Particles');
    name_hist_rec=sprintf(['picture_',num2str(mag),'_',num2str(k),'_size_histogram_rectangle','.png']);
    saveas(1,name_hist_rec);
    close all;
endif

if num_total(3) ~= 0
    [cnt_tri,center_tri]=hist(sizeA_tri,3);
    figure
    bar(center_tri,cnt_tri,'FaceColor','r','EdgeColor','k','LineWidth',2,"hist");
    xlabel('Area [ $\mu\text{m}^2$ ]');

```

```

ylabel ('Particles');
name_hist_tri=sprintf(['picture_',num2str(mag),'_',num2str(k),'_size_histogram_triangle','.png']);
saveas(1,name_hist_tri);
close all;
endif
if num_total(4) ~= 0
    [cnt_und,center_und]=hist(sizeA_und,3);
    figure
    bar(center_und,cnt_und,'FaceColor','r','EdgeColor','k','LineWidth',2,"hist");
    xlabel('Area [ $\mu\text{m}^2$ ]');
    ylabel ('Particles');
    name_hist_und=sprintf(['picture_',num2str(mag),'_',num2str(k),'_size_histogram_undecided','.png']);
    saveas(1,name_hist_und);
    close all;
endif

endif

case{221}
sizeA_metric=((100/207)^2)*sizeA;
maxparticle=max(sizeA_metric);
[count,bincenter]=hist(sizeA_metric,5);
figure
bar(bincenter,count,'FaceColor','r','EdgeColor','k','LineWidth',2,"hist");
xlabel('Area [ $\mu\text{m}^2$ ]');
ylabel ('Particles');
name_hist=sprintf(['picture_',num2str(mag),'_',num2str(k),'_size_histogram','.png']);
saveas(1,name_hist);
close all;

%%Global size statistics generation
%First image
if length_part_old==0
    size_out=sizeA_metric;
    length_part_old=num_regions;
%Subsequent images
else
    %Save prior particle sizes in help array
    size_old=size_out;
    %Determine length of the new size output array
    length_part_new=length_part_old+num_regions;
    size_out=zeros(1,length_part_new);
    for i=1:length_part_old
        %Save old particle sizes in new array

```

```

    size_out(i)=size_old(i);
endfor
for i=(length_part_old+1):(length_part_new)
    %Add particle sizes from current image
    size_out(i)=sizeA_metric(i-length_part_old);
endfor
%Adjust the length of the array required to save the particle sizes
length_part_old=length(size_out);
end

if single_image_shape==1
    %Histogram for shape specific subplots
    sizeA_ell=zeros(1,num_total(1));
    sizeA_rec=zeros(1,num_total(2));
    sizeA_tri=zeros(1,num_total(3));
    sizeA_und=zeros(1,num_total(4));
    m=n=o=p=1;
    for i=1:num_regions
        if num_ell(i)==1
            sizeA_ell(m)=sizeA_metric(i);
            m++;
        endif
        if num_rec(i)==1
            sizeA_rec(n)=sizeA_metric(i);
            n++;
        endif
        if num_tri(i)==1
            sizeA_tri(o)=sizeA_metric(i);
            o++;
        endif
        if num_und(i)==1
            sizeA_und(p)=sizeA_metric(i);
            p++;
        endif
    endfor

    if num_total(1) ~= 0
        [cnt_ell,center_ell]=hist(sizeA_ell,3);
        figure
        bar(center_ell,cnt_ell,'FaceColor','r','EdgeColor','k','LineWidth',2,"hist");
        xlabel('Area [ $\mu\text{m}^2$ ]');
        ylabel ('Particles');
        name_hist_ell=sprintf(['picture_',num2str(mag),'_',num2str(k),'_size_histogram_ellipse','.png']);
        saveas(1,name_hist_ell);
    end
end

```

```

close all;
endif
if num_total(2) ~= 0
    [cnt_rec,center_rec]=hist(sizeA_rec,3);
    figure
    bar(center_rec,cnt_rec,'FaceColor','r','EdgeColor','k','LineWidth',2,"hist");
    xlabel('Area [ $\mu\text{m}^2$ ]');
    ylabel ('Particles');
    name_hist_rec=sprintf(['picture_',num2str(mag),'_',num2str(k),'_size_histogram_rectangle','.png']);
    saveas(1,name_hist_rec);
    close all;
endif
if num_total(3) ~= 0
    [cnt_tri,center_tri]=hist(sizeA_tri,3);
    figure
    bar(center_tri,cnt_tri,'FaceColor','r','EdgeColor','k','LineWidth',2,"hist");
    xlabel('Area [ $\mu\text{m}^2$ ]');
    ylabel ('Particles');
    name_hist_tri=sprintf(['picture_',num2str(mag),'_',num2str(k),'_size_histogram_triangle','.png']);
    saveas(1,name_hist_tri);
    close all;
endif
if num_total(4) ~= 0
    [cnt_und,center_und]=hist(sizeA_und,3);
    figure
    bar(center_und,cnt_und,'FaceColor','r','EdgeColor','k','LineWidth',2,"hist");
    xlabel('Area [ $\mu\text{m}^2$ ]');
    ylabel ('Particles');
    name_hist_und=sprintf(['picture_',num2str(mag),'_',num2str(k),'_size_histogram_undecided','.png']);
    saveas(1,name_hist_und);
    close all;
endif

endif

case{50}
sizeA_metric=((600/281)^2)*sizeA;
maxparticle=max(sizeA_metric);
[count,bincenter]=hist(sizeA_metric,5);
figure
bar(bincenter,count,'FaceColor','r','EdgeColor','k','LineWidth',2,"hist");
xlabel('Area [ $\mu\text{m}^2$ ]');
ylabel ('Particles');
name_hist=sprintf(['picture_',num2str(mag),'_',num2str(k),'_size_histogram','.png']);

```

```

saveas(1,name_hist);
close all;

%%Global size statistics generation
%First image
if length_part_old==0
    size_out=sizeA_metric;
    length_part_old=num_regions;
%Subsequent images
else
    %Save prior particle sizes in help array
    size_old=size_out;
    %Determine length of the new size output array
    length_part_new=length_part_old+num_regions;
    size_out=zeros(1,length_part_new);
    for i=1:length_part_old
        %Save old particle sizes in new array
        size_out(i)=size_old(i);
    endfor
    for i=(length_part_old+1):(length_part_new)
        %Add particle sizes from current image
        size_out(i)=sizeA_metric(i-length_part_old);
    endfor
    %Adjust the length of the array required to save the particle sizes
    length_part_old=length(size_out);
end

if single_image_shape==1
    %Histogram for shape specific subplots
    sizeA_ell=zeros(1,num_total(1));
    sizeA_rec=zeros(1,num_total(2));
    sizeA_tri=zeros(1,num_total(3));
    sizeA_und=zeros(1,num_total(4));
    m=n=o=p=1;
    for i=1:num_regions
        if num_ell(i)==1
            sizeA_ell(m)=sizeA_metric(i);
            m++;
        end
        if num_rec(i)==1
            sizeA_rec(n)=sizeA_metric(i);
            n++;
        end
        if num_tri(i)==1

```

```

    sizeA_tri(o)=sizeA_metric(i);
    o++;
endif
if num_und(i)==1
    sizeA_und(p)=sizeA_metric(i);
    p++;
endif
endfor

if num_total(1) ~= 0
    [cnt_ell,center_ell]=hist(sizeA_ell,3);
    figure
    bar(center_ell,cnt_ell,'FaceColor','r','EdgeColor','k','LineWidth',2,"hist");
    xlabel('Area [ $\mu\text{m}^2$ ]');
    ylabel ('Particles');
    name_hist_ell=sprintf(['picture_',num2str(mag),'_',num2str(k),'_size_histogram_ellipse','.png']);
    saveas(1,name_hist_ell);
    close all;
endif
if num_total(2) ~= 0
    [cnt_rec,center_rec]=hist(sizeA_rec,3);
    figure
    bar(center_rec,cnt_rec,'FaceColor','r','EdgeColor','k','LineWidth',2,"hist");
    xlabel('Area [ $\mu\text{m}^2$ ]');
    ylabel ('Particles');
    name_hist_rec=sprintf(['picture_',num2str(mag),'_',num2str(k),'_size_histogram_rectangle','.png']);
    saveas(1,name_hist_rec);
    close all;
endif
if num_total(3) ~= 0
    [cnt_tri,center_tri]=hist(sizeA_tri,3);
    figure
    bar(center_tri,cnt_tri,'FaceColor','r','EdgeColor','k','LineWidth',2,"hist");
    xlabel('Area [ $\mu\text{m}^2$ ]');
    ylabel ('Particles');
    name_hist_tri=sprintf(['picture_',num2str(mag),'_',num2str(k),'_size_histogram_triangle','.png']);
    saveas(1,name_hist_tri);
    close all;
endif
if num_total(4) ~= 0
    [cnt_und,center_und]=hist(sizeA_und,3);
    figure
    bar(center_und,cnt_und,'FaceColor','r','EdgeColor','k','LineWidth',2,"hist");
    xlabel('Area [ $\mu\text{m}^2$ ]');

```

```

ylabel ('Particles');
name_hist_und=sprintf(['picture_',num2str(mag),'_',num2str(k),'_size_histogram_undecided','.png']);
saveas(1,name_hist_und);
close all;
endif

endif

case{20}
sizeA_metric=((1000/188)^2)*sizeA;
maxparticle=max(sizeA_metric);
[count,bincenter]=hist(sizeA_metric,5);
figure
bar(bincenter,count,'FaceColor','r','EdgeColor','k','LineWidth',2,"hist");
xlabel('Area [ $\mu\text{m}^2$ ]');
ylabel ('Particles');
name_hist=sprintf(['picture_',num2str(mag),'_',num2str(k),'_size_histogram','.png']);
saveas(1,name_hist);
close all;

%%Global size statistics generation
%First image
if length_part_old==0
    size_out=sizeA_metric;
    length_part_old=num_regions;
%Subsequent images
else
    %Save prior particle sizes in help array
    size_old=size_out;
    %Determine length of the new size output array
    length_part_new=length_part_old+num_regions;
    size_out=zeros(1,length_part_new);
    for i=1:length_part_old
        %Save old particle sizes in new array
        size_out(i)=size_old(i);
    endfor
    for i=(length_part_old+1):(length_part_new)
        %Add particle sizes from current image
        size_out(i)=sizeA_metric(i-length_part_old);
    endfor
    %Adjust the length of the array required to save the particle sizes
    length_part_old=length(size_out);
end

```

```

if single_image_shape==1
    %Histogram for shape specific subplots
    sizeA_ell=zeros(1,num_total(1));
    sizeA_rec=zeros(1,num_total(2));
    sizeA_tri=zeros(1,num_total(3));
    sizeA_und=zeros(1,num_total(4));
    m=n=o=p=1;
    for i=1:num_regions
        if num_ell(i)==1
            sizeA_ell(m)=sizeA_metric(i);
            m++;
        endif
        if num_rec(i)==1
            sizeA_rec(n)=sizeA_metric(i);
            n++;
        endif
        if num_tri(i)==1
            sizeA_tri(o)=sizeA_metric(i);
            o++;
        endif
        if num_und(i)==1
            sizeA_und(p)=sizeA_metric(i);
            p++;
        endif
    endfor

    if num_total(1) ~= 0
        [cnt_ell,center_ell]=hist(sizeA_ell,3);
        figure
        bar(center_ell,cnt_ell,'FaceColor','r','EdgeColor','k','LineWidth',2,"hist");
        xlabel('Area [ $\mu\text{m}^2$ ]');
        ylabel ('Particles');
        name_hist_ell=sprintf(['picture_',num2str(mag),'_',num2str(k),'_size_histogram_ellipse','.png']);
        saveas(1,name_hist_ell);
        close all;
    endif

    if num_total(2) ~= 0
        [cnt_rec,center_rec]=hist(sizeA_rec,3);
        figure
        bar(center_rec,cnt_rec,'FaceColor','r','EdgeColor','k','LineWidth',2,"hist");
        xlabel('Area [ $\mu\text{m}^2$ ]');
        ylabel ('Particles');
        name_hist_rec=sprintf(['picture_',num2str(mag),'_',num2str(k),'_size_histogram_rectangle','.png']);
        saveas(1,name_hist_rec);
    end

```



```

        close all;
    endif
    if num_total(3) ~= 0
        [cnt_tri,center_tri]=hist(sizeA_tri,3);
        figure
        bar(center_tri,cnt_tri,'FaceColor','r','EdgeColor','k','LineWidth',2,"hist");
        xlabel('Area [ $\mu\text{m}^2$ ]');
        ylabel ('Particles');
        name_hist_tri=sprintf(['picture_',num2str(mag),'_',num2str(k),'_size_histogram_triangle','.png']);
        saveas(1,name_hist_tri);
        close all;
    endif
    if num_total(4) ~= 0
        [cnt_und,center_und]=hist(sizeA_und,3);
        figure
        bar(center_und,cnt_und,'FaceColor','r','EdgeColor','k','LineWidth',2,"hist");
        xlabel('Area [ $\mu\text{m}^2$ ]');
        ylabel ('Particles');
        name_hist_und=sprintf(['picture_',num2str(mag),'_',num2str(k),'_size_histogram_undecided','.png']);
        saveas(1,name_hist_und);
        close all;
    endif

    endif

    otherwise
        printf("Area calculation isn't yet implemented for the selected magnification. Please redo with supported magnification or add
code for the required magnification by calculating area of 1px");
    endswitch

## %Saving the B/W image of particle area and the perimeter of the particles superimposed on top of the original image
    name_img=sprintf(['picture_',num2str(mag),'_',num2str(k),'_png']);
    imwrite(img_clear4,name_img);
    name_overlay=sprintf(['picture_',num2str(mag),'_',num2str(k),'_overlay','.png']);
    imwrite(img_overlay,name_overlay);

endfor

%%Returning graphs containing information about particle size distribution over a series of images
[count_size_global,bincenter_size_global]=hist(size_out,40);
figure
bar(bincenter_size_global,count_size_global,'FaceColor','r',"hist");
xlabel('Area [ $\mu\text{m}^2$ ]');
ylabel ('Count');

```

```

name_hist_size_global=sprintf(['picture_',num2str(mag),'_size_global','png']);
saveas(1,name_hist_size_global);
close all;
csvwrite("size_global.csv",reshape(size_out,length_part_old,1));

%%The following function returns global statistics on shape parameters provided it is enabled
if (length_old > 0)
    [count_sol_global,bincenter_sol_global]=hist(sol_out,20);
    figure
    bar(bincenter_sol_global,count_sol_global,'FaceColor','r',"hist");
    xlabel('Solidity A_{Particle}/A_{Convexhull}');
    ylabel ('Count');
    name_hist_solidity_global=sprintf(['picture_',num2str(mag),'_solidity_global','png']);
    saveas(1,name_hist_solidity_global);
    close all;
    csvwrite("solidity_global.csv",reshape(sol_out,length_part_old,1));

    [count_cvx_global,bincenter_cvx_global]=hist(cvx_out,20);
    figure
    bar(bincenter_cvx_global,count_cvx_global,'FaceColor','r',"hist");
    xlabel('Convexity P_{Convexhull}/P_{Particle}');
    ylabel ('Count');
    name_hist_convexity_global=sprintf(['picture_',num2str(mag),'_convexity_global','png']);
    saveas(1,name_hist_convexity_global);
    close all;
    csvwrite("convexity_global.csv",reshape(cvx_out,length_part_old,1));

    [count_rar_global,bincenter_rar_global]=hist(rar_out,20);
    figure
    bar(bincenter_rar_global,count_rar_global,'FaceColor','r',"hist");
    xlabel('Reciprocal aspect ratio length(fitted minor axis)/length(fitted major axis)');
    ylabel ('Count');
    name_hist_rar_global=sprintf(['picture_',num2str(mag),'_rar_global','png']);
    saveas(1,name_hist_rar_global);
    close all;
    csvwrite("reciprocalaspectratio_global.csv",reshape(rar_out,length_part_old,1));

    [count_fmr_global,bincenter_fmr_global]=hist(fmr_out,20);
    figure
    bar(bincenter_fmr_global,count_fmr_global,'FaceColor','r',"hist");
    xlabel('Ferret major axis ratio length(feret major axis)/length(fitted major axis)');
    ylabel ('Count');
    name_hist_fmr_global=sprintf(['picture_',num2str(mag),'_fmr_global','png']);
    saveas(1,name_hist_fmr_global);

```

```
close all;  
csvwrite("feretmajoraxisratio_global.csv",reshape(fmr_out,length_part_old,1));  
endif
```

## Script S2: MP\_Analysis\_Particle\_RGB.m

The following algorithm was used for the evaluation of the validation series (2<sup>nd</sup> series). Small changes had to be made to accommodate the different image format (JPG, RGB, resolution: 1024 x 768 px).

```
%%%Clearing storage%%%
clear all; %clear all variables
##clc; %clear console
close all; %close all figures

%%%Initiatlizing Packages%%%
%Image Package Initialization: Core octave package
pkg load image;
%Computational Geometry Initialization: Requires one-time installation via "pkg install -forge matgeom" in prompt after
downloading here: https://octave.sourceforge.io/download.php?package=matgeom-1.2.2.tar.gz
pkg load matgeom;

%%%Loading Images from folder%%%
[stat,img_idx]=fileattrib('*.jpg');
%Number of images, is the length of the indexed vector
img_amount=length(img_idx);
%Helping variable for global shape parameters
length_old=0;
%Helping variable for global size evaluation
length_part_old=0;

%%%Settings%%%
%Select the contrast of the original image. If the background is very light, set bright image value 1
bright_image=0;
%Magnification of image enhancement
mag=20;
%Specify the border of image section to be analyzed in horizontal (x) direction or verical (y) direction
%Assumes, that SEM image labeling is superimposed in the bottom half.
dim_x=1024;
dim_y=768;
%Select the edge detection method (Set edge_method "1" for Sobel or "2" for Canny or "3" for Thresholding by Otsu)
edge_method=2;
%Select shape analysis by setting the variable "1", otherwise, give it value "0"
shape_option=0;
%Select geometric overlay method by setting variable "1", otherwise give it different value
shape_geometry=0;
```

```

%Select value "1", if shape analysis statistics for single images are wanted, set it "0" otherwise
single_image_shape=0;

%Initialization of structuring elements
SE_tophat=strel("disk",10,0); %Structuring Element for top-hat Transformation
SE_close=strel("disk",6,0); %Structuring Element for closing after edge detection
SE_bound=strel("disk",3,0); %Thickness of the boundary
%Threshold value for the height of H-max transform
height_th=5;

%Select the value of the LDPE particle sample. It is found in the status bar of SEM images
LDPE=1.4;

switch(LDPE)
%Calculate the minimum and maximum sieve diameter in  $\mu\text{m}$  depending on sieve identifier
case{1.1}
    sieve_min=0;
    sieve_max=500;
case{1.2}
    sieve_min=400;
    sieve_max=500;
case{1.3}
    sieve_min=300;
    sieve_max=400;
case{1.4}
    sieve_min=200;
    sieve_max=300;
case{1.5}
    sieve_min=150;
    sieve_max=200;
case{1.6}
    sieve_min=125;
    sieve_max=150;
case{1.7}
    sieve_min=100;
    sieve_max=125;
case{1.8}
    sieve_min=50;
    sieve_max=100;
case{3}
    sieve_min=500;
    sieve_max=900;
case{2.1}
    sieve_min=0;
    sieve_max=300;
case{2.2}

```

```

sieve_min=200;
sieve_max=300;
case{2.3}
sieve_min=150;
sieve_max=200;
case{2.4}
sieve_min=125;
sieve_max=150;
case{2.5}
sieve_min=100;
sieve_max=125;
case{2.6}
sieve_min=50;
sieve_max=100;
case{2.7}
sieve_min=25;
sieve_max=50;
case{4}
sieve_min=300;
sieve_max=450;
endswitch

%%%Image Analysis%%%
for k=1:img_amount
    %%Selecting and cropping Image
    img_in=imread(img_idx(k).Name,"PixelRegion",[1 dim_y],[1 dim_x]);

    %%TopHat-Filtering
    img_tophat_gray=imtophat(img_in,SE_tophat);
    img_tophat=im2double(img_tophat_gray);
    ## img_tophat=imtophat(img_in,SE_tophat);
    ## figure, imhist(img_tophat), axis "auto y";
    img_adj2=imadjust(img_tophat);
    img_adj=rgb2gray(img_adj2);
    ## img_adj=imadjust(img_tophat,[0.05;0.4], [0;1],1);
    ## figure, imhist(img_adj), axis "auto y";
    ## figure, imshow(img_adj);
    ##
    figure,subplot(221),imshow(img_in),subplot(222),imshow(img_tophat_gray),subplot(223),imshow(img_tophat),subplot(224),imshow(img_adj);
    ## figure, subplot(131),imshow(img_tophat),subplot(132),imshow(img_adj),subplot(133),imshow(img_adj2);

    %%Edge-Finding

```

```

switch(edge_method)
case{1}
    %Sobel Edge-Finding algorithm
    img_edge=edge(img_adj,"Sobel");
## figure,subplot(121),imshow(img_adj),subplot(122),imshow(img_edge);
case{2}
    %Calculating the threshold via Otsu's method
    thresh=graythresh(img_adj);
    %Canny Edge-Finding algorithm
    img_edge=edge(img_adj,"Canny",0.5*thresh);
## figure, imshow(img_edge);
## figure,subplot(121),imshow(img_adj),subplot(122),imshow(img_edge);
case{3}
    img_edge=im2bw(img_adj,graythresh(img_adj));
## figure, imshow(img_edge);
otherwise
    printf("Please enter a valid value for the Edge-Finding method or define another one in the code using your selected value under
the variable edge_method");
endswitch

%%Closing holes on the edges
img_closed=imclose(img_edge,SE_close);
## figure, subplot(121), imshow(img_edge), subplot(122), imshow(img_closed);

%%Flood filling the enclosed areas. Filling before the watershed can lead to issues with particle agglomerates
img_filled=imfill(img_closed,"holes");
## figure, imshow(img_filled);
## figure, subplot(121), imshow(img_closed), subplot(122), imshow(img_filled);

%%Calculate the minimum size of particles considered for morphology depending on sieve size
switch(mag)
% 80 percent of all particles evaluated possess an fitted ellipse reciprocal aspect ratio (rar) of 1/2 or higher, which is used to define
upper thresholds
case{20}
    %Min size particles have circular cross section the size of the sieve opening
## th_min_metric=pi*(sieve_min/2)^2;
    th_min_metric=1.05*sieve_min^2;
    %Max size particles possess circular cross sections with cylindric shape and rar 1/3
    th_max_metric=pi*3/4*sieve_max^2;
    %Convert from metric to px size thresholds
    th_min_px=((472/3000)^2)*th_min_metric;
    th_max_px=((472/3000)^2)*th_max_metric;
case{50}
    %Min size particles have circular cross section the size of the sieve opening

```

```

th_min_metric=1.05*sieve_min^2;
%Max size particles have elliptical cross sections with rar 1/3, resulting in rectangles on the image
th_max_metric=pi*3/4*sieve_max^2;
%Convert from metric to px size thresholds
th_min_px=((281/600)^2)*th_min_metric;
th_max_px=((281/600)^2)*th_max_metric;
case{110}
%Min size particles have circular cross section the size of the sieve opening
th_min_metric=pi*(sieve_min/2)^2;
%Max size particles have elliptical cross sections with rar 1/3, with minor axis being the size of the cross section
th_max_metric=pi*3/4*sieve_max^2;
%Convert from metric to px size thresholds
th_min_px=((309/300)^2)*th_min_metric;
th_max_px=((309/300)^2)*th_max_metric;
endswitch

%%Removal of small particles/noise(2nd argument in bwareaopen enotes the boundary in px^2
img_clear1=bwareaopen(img_filled,th_min_px,4);
## figure,imshow(img_filled);
## figure,imshow(img_clear1);

%%Watershed iteration
%Calculates the Negative of the inverse of the binary image created by edge detection, filling and noise removal
distmap=bwdist(~img_clear1);
## distmap_img=distmap./(max(max(distmap)));
## figure, imshow(distmap_img);
img_marker = imextendedmax(distmap,height_th,4);
## mask2 = imextendedmin(distmap,4,4);
## figure,imshow(img_marker);
%Imimposemin makes sure only regional minima at non zero pixels of mask
minima = imimposemin(-distmap,img_marker);
img_ridgelines = watershed(minima);
## figure, imshow(img_ridgelines);
img_shed=img_clear1;
%The preprocessed image is getting shed in the places, where L has value 0
img_shed(img_ridgelines == 0) = 0;
## figure,imshow(img_shed);

%%More watershed attempts
## distmap_test=bwdist(~img_clear1);
## figure, imshow(distmap_test./max(max(distmap_test)));
## filter_test=fspecial("gaussian",6,2);
## distmap_test_filtered=imfilter(-distmap_test,filter_test);

```



```

## figure, imshow(distmap_test_filtered./(min(min(distmap_test_filtered))));
## img_ridgeline_test=watershed(distmap_test_filtered);
## figure, imshow(img_ridgeline_test);
## img_shed_test=img_clear1;
## img_shed_test(img_ridgeline_test == 0) = 0;
## figure, imshow(img_shed_test);

%%Trashy Watershed
## C=~img_clear1;
## D=-bwdist(C);
## distmap_img=D./(min(min(D)));
## figure, imshow(distmap_img);
## D(C)=-Inf;
## L=watershed(D);
## Wi=label2rgb(L,'hot','w');
## figure, imshow(Wi);
## img_shed=img_clear1;
## img_shed(L==0)=0;
## figure, imshow(im);

%%New Watershed segmentation attempt
## hy = fspecial("sobel");
## hx = hy';
## Iy = imfilter(double(img_in), hy, "replicate");
## Ix = imfilter(double(img_in), hx, "replicate");
## gradmag = sqrt(Ix.^2 + Iy.^2);
## SE_test=strel("disk",20,0);
## Ie=imerode(img_in,SE_test);
## Iobr=imreconstruct(Ie,img_in);
## Iobrd=imdilate(Iobr,SE_test);
## Iobrcbr=imreconstruct(imcomplement(Iobrd),imcomplement(Iobr));
## Iobrcbr=imcomplement(Iobrcbr);
## fgm=imregionalmax(Iobrcbr);
## I2=img_clear1;
## I2(fgm)=255;
## se2=strel(ones(5,5));
## fgm2=imclose(fgm,se2);
## fgm3=imerode(fgm2,se2);
## fgm4=bwareaopen(fgm3,20);
## I3=img_clear1;
## I3(fgm4)=255;
## bw=im2bw(Iobrcbr,graythresh(Iobrcbr));
## D=bwdist(bw);
## DL=watershed(D);

```

```

## bgm=DL==0;
## gradmag2 = imimposemin(gradmag, bgm | fgm4);
## L=watershed(gradmag2);
## Lrgb=label2rgb(L,'jet','w','shuffle');
## figure,subplot(121),imshow(Lrgb),subplot(122),imshow(img_in),
## hold on
## himage=imshow(Lrgb);
## set(himage,'AlphaData',0.3);
## figure,
subplot(231),imshow(Iobr),subplot(232),imshow(Iobrcbr),subplot(233),imshow(I2),subplot(234),imshow(I3),subplot(235),imshow(b
w),subplot(236),imshow(bgm);

%%Clearing the particles touching the borders(earlier application leads to removal of overlapping objects)
img_clear=imclearborder(img_shed,4);
##
figure,subplot(231),imshow(img_in),subplot(232),imshow(img_edge),subplot(233),imshow(img_closed),subplot(234),imshow(img_f
illed),subplot(235),imshow(img_clear);
## figure, imshow(img_clear);

%Codepart for troubleshooting with filter model assumptions
## img_bound_help=im2bw(img_clear-imerode(img_clear,SE_bound));
#### figure, imshow(img_bound_help);
## img_overlay_help=img_in;
## if bright_image==1
## img_overlay_help(img_bound_help==1)=0;
## figure, imshow(img_overlay_help);
## else
## img_overlay_help(img_bound_help==1)=255;
## figure, imshow(img_overlay_help);
## end

%%Removal of small particles and noise after watershed and border clearing
%Remove particles belonging in a smaller sieve fraction and oversegmented particles
img_clear2=bwareaopen(img_clear,th_min_px,4);
## figure, imshow(img_clear2);
%Retain particle agglomerations and particles belonging in a higher sieve fraction
img_clear3=bwareaopen(img_clear,th_max_px,4);
## figure, imshow(img_clear3);
%Retain only particles which belong in the selected sieve fraction
img_clear4=im2bw(img_clear2-img_clear3);
## figure, imshow(img_clear4);
## figure, subplot(221), imshow(img_clear1), subplot(222), imshow(img_clear2), subplot(223), imshow(img_clear3), subplot(224),
imshow(img_clear4);

```

```

%%Calculating the boundary of the particles
img_bound=im2bw(img_clear4-imerode(img_clear4,SE_bound));
## subplot(236),imshow(img_bound);
## figure, imshow(img_bound);

%%Superimpose the boundary of the particles on top of the original image
img_overlay=img_in;
if bright_image==1
    img_overlay(img_bound==1)=0;
## figure, imshow(img_overlay);
## figure, subplot(121), imshow(img_filled), subplot(122), imshow(img_overlay);
else
    img_overlay(img_bound==1)=255;
## figure, imshow(img_overlay);
## figure, subplot(121), imshow(img_filled), subplot(122), imshow(img_overlay);
end

%%Generating statistics
switch(shape_option)
case{0}
    stats = regionprops(img_clear4,"all");
    sizeA = [stats.Area]; %size of regions in px2
    num_regions = length(stats); %number of regions

case{1}
    stats = regionprops(img_clear4,"all");
    sizeA = [stats.Area]; %size of regions in px2
    majX = [stats.MajorAxisLength]; %length of the major axis of fitted ellipse
    minX = [stats.MinorAxisLength]; %length of the minor axis of fitted ellipse
    num_regions = length(stats); %number of regions

%%Iteration that calculates the Max-Feret-Diameter and Bounding-Box of each particle by using the convex hull. Brute force
bb_area = zeros(1,num_regions); %Vector that contains the Bounding-Box size for each particle
maxferetdiam = zeros(1,num_regions); %Vector that contains the Max Feret Diameter for each particle
for i=1:num_regions
    bb_info = stats(i).BoundingBox; %Read out the Bounding-Box info for the i-th particle
    bb_area(i) = bb_info(3)*bb_info(4); %Multiply the length with the width of the bounding box
    particle_convexhull = stats(i).ConvexHull; %Read out the convex hull coordinates of the i-th particle
    dist_vert = distancePoints(particle_convexhull, particle_convexhull); %Calculate the euclidian distance in px for each vertex of
the convex hull of the i-th particle
    maxferetdiam(i) = max(max(dist_vert)); %Write the maximum entry of the distance Matrix for the i-th particle into the
corresponding vector
endfor

```

```

%%Calculating shape parameters
%(reciprocal axis ratio RAR)
rar = minX./majX;
%(rectangularity RTY)
rty = sizeA./bb_area;
%(feret major axis ratio FMR)
fmr = maxferetdiam./majX;

if shape_geometry == 1
    %%Shape analysis
    num_tri=num_ell=num_rec=num_und=zeros(1,num_regions);
    num_total=zeros(1,4); %Vector that's utilized to save the total count of all shapes identified
    for j=1:num_regions
        if (rty(j) <= 0.6 && fmr(j) >= 1.27)
            num_tri(j)=1;
        else
            num_ell(j)=0;
        endif
        if ((rar(j) >= 0.98 && rty(j) >= 0.98) || (rar(j) >= 0.97 && fmr(j) >= 1.2) || (rar(j) < 0.98 && rty(j) >= 0.98) || (fmr(j) < 0.98 || fmr(j) >
1.09))
            num_rec(j)=1;
        else
            num_und(j)=0;
        endif
        if ((rar(j) >= 0.99 && (fmr(j) > 0.995 && fmr(j) <= 1.15)) || (fmr(j) >= 0.98 && fmr(j) <= 1.09))
            num_ell(j)=1;
        else
            num_und(j)=0;
        endif
        %If Shape parameters overlap and don't allow clear identification, a particle is classified as undecided/inconclusive
        if ((num_tri(j)==1 && num_rec(j)==1) || (num_tri(j)==1&&num_ell(j)==1) || (num_rec(j)==1&&num_ell(j)==1))
            num_tri(j)=num_rec(j)=num_ell(j)=0;
            num_und(j)=1;
        endif
    endfor
    num_total(1)=sum(num_ell);
    num_total(2)=sum(num_rec);
    num_total(3)=sum(num_tri);
    num_total(4)=sum(num_und);

%%Histogram for particle shape distribution
figure
bar(num_total,'FaceColor','r','EdgeColor','k','LineWidth',2,'hist');

```

```

xlabel('Shape');
ylabel('Count');
xticks(1:4);
xticklabels(['Ellipse','Rectangle','Triangle','Inconclusive']);
name_shape_hist=sprintf(['picture_',num2str(mag),'_',num2str(k),'_shape_histogram','.png']);
saveas(1,name_shape_hist);
close all;

%%Superimpose the detected ellipse or rectangle over the outline of the detected particle
figure
imshow(img_bound)

t = linspace(0,2*pi,100);
hold on
for i = 1:num_regions
    if (num_ell(i)==1)
        a = stats(i).MajorAxisLength/2;
        b = stats(i).MinorAxisLength/2;
        Xc = stats(i).Centroid(1);
        Yc = stats(i).Centroid(2);
        phi = deg2rad(-stats(i).Orientation);
        x = Xc + a*cos(t)*cos(phi) - b*sin(t)*sin(phi);
        y = Yc + a*cos(t)*sin(phi) + b*sin(t)*cos(phi);
        plot(x,y,'r','LineWidth',0.5)
    endif
    if (num_rec(i)==1)
        le = stats(i).MajorAxisLength/2*0.886227;
        wi = stats(i).MinorAxisLength/2*0.886227;
        Xc = stats(i).Centroid(1);
        Yc = stats(i).Centroid(2);
        center = transpose(stats(i).Centroid);
        theta = deg2rad(stats(i).Orientation);
        coords = [Xc-le Xc-le Xc+le Xc+le;...
                  Yc-wi Yc+wi Yc+wi Yc-wi];
        R = [cos(theta) sin(theta);...
              -sin(theta) cos(theta)];
        rot_coords = R*(coords-repmat(center,[1 4]))+repmat(center,[1 4]);
        rot_coords(:,5)=rot_coords(:,1);
        line(rot_coords(1,:),rot_coords(2:,:), 'color','g','LineWidth',0.5);
    endif
endfor
name_overlay_shape=sprintf(['picture_',num2str(mag),'_',num2str(k),'_shape_overlay','.png']);
saveas(1,name_overlay_shape);
hold off

```

```

close all;
endif

%%Calculating Convexity and Solidity of the particle to describe deviation from a convex cross section
solidity_particle=convexity_particle=perim_cvxpoly=zeros(1,num_regions);
for i=1:num_regions
    solidity_particle(i)=stats(i).Solidity;
    perim_cvxpoly(i)=polygonLength(stats(i).ConvexHull);
    convexity_particle(i)=perim_cvxpoly(i)./stats(i).Perimeter;
endfor

%%Global shape parameter distribution
if length_old==0
    rar_out=rar;
    fmr_out=fmr;
    cvx_out=convexity_particle;
    sol_out=solidity_particle;
    length_old=num_regions;
else
    %Save prior shape parameters in help array
    rar_old=rar_out;
    fmr_old=fmr_out;
    cvx_old=cvx_out;
    sol_old=sol_out;

    %Determine length of new shape parameter array
    length_new=length_old+num_regions;

    %Initialize new output arrays
    rar_out=fmr_out=sol_out=cvx_out=zeros(1,length_new);
    for i=1:length_old
        rar_out(i)=rar_old(i);
        fmr_out(i)=fmr_old(i);
        sol_out(i)=sol_old(i);
        cvx_out(i)=cvx_old(i);
    endfor

    for i=(length_old+1):(length_new)
        rar_out(i)=rar(i-length_old);
        fmr_out(i)=fmr(i-length_old);
        sol_out(i)=solidity_particle(i-length_old);
        cvx_out(i)=convexity_particle(i-length_old);
    endfor

    length_old=length(cvx_out);
end

```

```

%%Plotting Convexity and Solidity
if single_image_shape==1
    [count_solid,bincenter_solid]=hist(solidity_particle,3);
    figure
    bar(bincenter_solid,count_solid,'FaceColor','r','EdgeColor','k','LineWidth',2,"hist");
    xlabel('Solidity A_{Particle}/A_{Convexhull}');
    ylabel('Count');
    name_hist_solidity=sprintf(['picture_',num2str(mag),'_',num2str(k),'_solidity_histogram','.png']);
    saveas(1,name_hist_solidity);
    close all;

    [count_convex,bincenter_convex]=hist(convexity_particle,3);
    figure
    bar(bincenter_convex,count_convex,'FaceColor','r','EdgeColor','k','LineWidth',2,"hist");
    xlabel('Convexity P_{Convexhull}/P_{Particle}');
    ylabel('Count');
    name_hist_convexity=sprintf(['picture_',num2str(mag),'_',num2str(k),'_convexity_histogram','.png']);
    saveas(1,name_hist_convexity);
    close all;
endif

otherwise
    printf("The currently selected value for shape_option is not implemented. Please redo with supported shape_option values or
add a new case");
endswitch

%%The following section calculates corresponding metric areas in [ $\mu\text{m}^2$ ] from digital unit in [ $\text{px}^2$ ]
%%Tutorial for adding new magnification levels: Copy a case, select the desired magnification level
%%in the argument of case{}. Afterwards use GIMP or a comparable software to measure the distance scale
%%in px. Measure from the left pixel of the left border of the left end towards the left border of the
%%right end. The "Zähler" of the fraction of the variable sizeA_metric describes the length of the scale in
%%[ $\mu\text{m}$ ], the "Nenner" contains the measured length of the scale as described above in [px]

%%Hier werden zusammenhängende Pixelflächen[ $\text{px}^2$ ] in metrische Flächen [ $\mu\text{m}^2$ ] umgewandelt.
%%Zur Erweiterung einen case kopieren, die gewünschte Vergrößerung angeben und mit
%%Bildbearbeitungssoftware (z.B. Gimp) mit Lineal-Funktion die Skala zwischen den jeweils linken Balkenenden vermessen.
%%Der Zähler des Bruchs in sizeA_metric beschreibt die Skalalänge in  $\mu\text{m}$ , der Nenner die Pixelanzahl.
switch(mag)
case{110}
    sizeA_metric=((300/309)^2)*sizeA;
    maxparticle=max(sizeA_metric);
    [count,bincenter]=hist(sizeA_metric,5);
    figure

```

```

bar(bincenter,count,'FaceColor','r','EdgeColor','k','LineWidth',2,"hist");
xlabel('Area [ $\mu\text{m}^2$ ]');
ylabel ('Particles');
name_hist=sprintf(['picture_',num2str(mag),'_',num2str(k),'_size_histogram','.png']);
saveas(1,name_hist);
close all;

%%Global size statistics generation
%First image
if length_part_old==0
    size_out=sizeA_metric;
    length_part_old=num_regions;
%Subsequent images
else
    %Save prior particle sizes in help array
    size_old=size_out;
    %Determine length of the new size output array
    length_part_new=length_part_old+num_regions;
    size_out=zeros(1,length_part_new);
    for i=1:length_part_old
        %Save old particle sizes in new array
        size_out(i)=size_old(i);
    endfor
    for i=(length_part_old+1):(length_part_new)
        %Add particle sizes from current image
        size_out(i)=sizeA_metric(i-length_part_old);
    endfor
    %Adjust the length of the array required to save the particle sizes
    length_part_old=length(size_out);
end

if single_image_shape==1
    %Histogram for shape specific subplots
    sizeA_ell=zeros(1,num_total(1));
    sizeA_rec=zeros(1,num_total(2));
    sizeA_tri=zeros(1,num_total(3));
    sizeA_und=zeros(1,num_total(4));
    m=n=o=p=1;
    for i=1:num_regions
        if num_ell(i)==1
            sizeA_ell(m)=sizeA_metric(i);
            m++;
        endif
        if num_rec(i)==1

```



```

    sizeA_rec(n)=sizeA_metric(i);
    n++;
endif
if num_tri(i)==1
    sizeA_tri(o)=sizeA_metric(i);
    o++;
endif
if num_und(i)==1
    sizeA_und(p)=sizeA_metric(i);
    p++;
endif
endfor

if num_total(1) ~= 0
    [cnt_ell,center_ell]=hist(sizeA_ell,3);
    figure
    bar(center_ell,cnt_ell,'FaceColor','r','EdgeColor','k','LineWidth',2,"hist");
    xlabel('Area [ $\mu\text{m}^2$ ]');
    ylabel ('Particles');
    name_hist_ell=sprintf(['picture_',num2str(mag),'_',num2str(k),'_size_histogram_ellipse','.png']);
    saveas(1,name_hist_ell);
    close all;
endif

if num_total(2) ~= 0
    [cnt_rec,center_rec]=hist(sizeA_rec,3);
    figure
    bar(center_rec,cnt_rec,'FaceColor','r','EdgeColor','k','LineWidth',2,"hist");
    xlabel('Area [ $\mu\text{m}^2$ ]');
    ylabel ('Particles');
    name_hist_rec=sprintf(['picture_',num2str(mag),'_',num2str(k),'_size_histogram_rectangle','.png']);
    saveas(1,name_hist_rec);
    close all;
endif

if num_total(3) ~= 0
    [cnt_tri,center_tri]=hist(sizeA_tri,3);
    figure
    bar(center_tri,cnt_tri,'FaceColor','r','EdgeColor','k','LineWidth',2,"hist");
    xlabel('Area [ $\mu\text{m}^2$ ]');
    ylabel ('Particles');
    name_hist_tri=sprintf(['picture_',num2str(mag),'_',num2str(k),'_size_histogram_triangle','.png']);
    saveas(1,name_hist_tri);
    close all;
endif

if num_total(4) ~= 0

```

```

[cnt_und,center_und]=hist(sizeA_und,3);
figure
bar(center_und,cnt_und,'FaceColor','r','EdgeColor','k','LineWidth',2,"hist");
xlabel('Area [ $\mu\text{m}^2$ ]');
ylabel('Particles');
name_hist_und=sprintf(['picture_',num2str(mag),'_',num2str(k),'_size_histogram_undecided','_.png']);
saveas(1,name_hist_und);
close all;
endif

endif

case{221}
sizeA_metric=((100/207)^2)*sizeA;
maxparticle=max(sizeA_metric);
[count,bincenter]=hist(sizeA_metric,5);
figure
bar(bincenter,count,'FaceColor','r','EdgeColor','k','LineWidth',2,"hist");
xlabel('Area [ $\mu\text{m}^2$ ]');
ylabel('Particles');
name_hist=sprintf(['picture_',num2str(mag),'_',num2str(k),'_size_histogram','_.png']);
saveas(1,name_hist);
close all;

%%Global size statistics generation
%First image
if length_part_old==0
    size_out=sizeA_metric;
    length_part_old=num_regions;
%Subsequent images
else
    %Save prior particle sizes in help array
    size_old=size_out;
    %Determine length of the new size output array
    length_part_new=length_part_old+num_regions;
    size_out=zeros(1,length_part_new);
    for i=1:length_part_old
        %Save old particle sizes in new array
        size_out(i)=size_old(i);
    endfor
    for i=(length_part_old+1):(length_part_new)
        %Add particle sizes from current image
        size_out(i)=sizeA_metric(i-length_part_old);
    endfor
endfor

```

```

%Adjust the length of the array required to save the particle sizes
length_part_old=length(size_out);
end

if single_image_shape==1
%Histogram for shape specific subplots
sizeA_ell=zeros(1,num_total(1));
sizeA_rec=zeros(1,num_total(2));
sizeA_tri=zeros(1,num_total(3));
sizeA_und=zeros(1,num_total(4));
m=n=o=p=1;
for i=1:num_regions
    if num_ell(i)==1
        sizeA_ell(m)=sizeA_metric(i);
        m++;
    endif
    if num_rec(i)==1
        sizeA_rec(n)=sizeA_metric(i);
        n++;
    endif
    if num_tri(i)==1
        sizeA_tri(o)=sizeA_metric(i);
        o++;
    endif
    if num_und(i)==1
        sizeA_und(p)=sizeA_metric(i);
        p++;
    endif
endfor

if num_total(1) ~= 0
    [cnt_ell,center_ell]=hist(sizeA_ell,3);
    figure
    bar(center_ell,cnt_ell,'FaceColor','r','EdgeColor','k','LineWidth',2,"hist");
    xlabel('Area [ $\mu\text{m}^2$ ]');
    ylabel('Particles');
    name_hist_ell=sprintf(['picture_',num2str(mag),'_',num2str(k),'_size_histogram_ellipse','.png']);
    saveas(1,name_hist_ell);
    close all;
endif

if num_total(2) ~= 0
    [cnt_rec,center_rec]=hist(sizeA_rec,3);
    figure
    bar(center_rec,cnt_rec,'FaceColor','r','EdgeColor','k','LineWidth',2,"hist");

```

```

xlabel('Area [ $\mu\text{m}^2$ ]');
ylabel('Particles');
name_hist_rec=sprintf(['picture_',num2str(mag),'_',num2str(k),'_size_histogram_rectangle','.png']);
saveas(1,name_hist_rec);
close all;
endif
if num_total(3) ~= 0
    [cnt_tri,center_tri]=hist(sizeA_tri,3);
    figure
    bar(center_tri,cnt_tri,'FaceColor','r','EdgeColor','k','LineWidth',2,"hist");
    xlabel('Area [ $\mu\text{m}^2$ ]');
    ylabel('Particles');
    name_hist_tri=sprintf(['picture_',num2str(mag),'_',num2str(k),'_size_histogram_triangle','.png']);
    saveas(1,name_hist_tri);
    close all;
endif
if num_total(4) ~= 0
    [cnt_und,center_und]=hist(sizeA_und,3);
    figure
    bar(center_und,cnt_und,'FaceColor','r','EdgeColor','k','LineWidth',2,"hist");
    xlabel('Area [ $\mu\text{m}^2$ ]');
    ylabel('Particles');
    name_hist_und=sprintf(['picture_',num2str(mag),'_',num2str(k),'_size_histogram_undecided','.png']);
    saveas(1,name_hist_und);
    close all;
endif

endif

case{50}
sizeA_metric=((600/281)^2)*sizeA;
maxparticle=max(sizeA_metric);
[count,bincenter]=hist(sizeA_metric,5);
figure
bar(bincenter,count,'FaceColor','r','EdgeColor','k','LineWidth',2,"hist");
xlabel('Area [ $\mu\text{m}^2$ ]');
ylabel('Particles');
name_hist=sprintf(['picture_',num2str(mag),'_',num2str(k),'_size_histogram','.png']);
saveas(1,name_hist);
close all;

%%Global size statistics generation
%First image
if length_part_old==0

```

```

size_out=sizeA_metric;
length_part_old=num_regions;
%Subsequent images
else
    %Save prior particle sizes in help array
    size_old=size_out;
    %Determine length of the new size output array
    length_part_new=length_part_old+num_regions;
    size_out=zeros(1,length_part_new);
    for i=1:length_part_old
        %Save old particle sizes in new array
        size_out(i)=size_old(i);
    endfor
    for i=(length_part_old+1):(length_part_new)
        %Add particle sizes from current image
        size_out(i)=sizeA_metric(i-length_part_old);
    endfor
    %Adjust the length of the array required to save the particle sizes
    length_part_old=length(size_out);
end

if single_image_shape==1
    %Histogram for shape specific subplots
    sizeA_ell=zeros(1,num_total(1));
    sizeA_rec=zeros(1,num_total(2));
    sizeA_tri=zeros(1,num_total(3));
    sizeA_und=zeros(1,num_total(4));
    m=n=o=p=1;
    for i=1:num_regions
        if num_ell(i)==1
            sizeA_ell(m)=sizeA_metric(i);
            m++;
        end
        if num_rec(i)==1
            sizeA_rec(n)=sizeA_metric(i);
            n++;
        end
        if num_tri(i)==1
            sizeA_tri(o)=sizeA_metric(i);
            o++;
        end
        if num_und(i)==1
            sizeA_und(p)=sizeA_metric(i);
            p++;
        end
    end
end

```

```

endif
endfor

if num_total(1) ~= 0
    [cnt_ell,center_ell]=hist(sizeA_ell,3);
    figure
    bar(center_ell,cnt_ell,'FaceColor','r','EdgeColor','k','LineWidth',2,"hist");
    xlabel('Area [ $\mu\text{m}^2$ ]');
    ylabel ('Particles');
    name_hist_ell=sprintf(['picture_',num2str(mag),'_',num2str(k),'_size_histogram_ellipse','.png']);
    saveas(1,name_hist_ell);
    close all;
endif
if num_total(2) ~= 0
    [cnt_rec,center_rec]=hist(sizeA_rec,3);
    figure
    bar(center_rec,cnt_rec,'FaceColor','r','EdgeColor','k','LineWidth',2,"hist");
    xlabel('Area [ $\mu\text{m}^2$ ]');
    ylabel ('Particles');
    name_hist_rec=sprintf(['picture_',num2str(mag),'_',num2str(k),'_size_histogram_rectangle','.png']);
    saveas(1,name_hist_rec);
    close all;
endif
if num_total(3) ~= 0
    [cnt_tri,center_tri]=hist(sizeA_tri,3);
    figure
    bar(center_tri,cnt_tri,'FaceColor','r','EdgeColor','k','LineWidth',2,"hist");
    xlabel('Area [ $\mu\text{m}^2$ ]');
    ylabel ('Particles');
    name_hist_tri=sprintf(['picture_',num2str(mag),'_',num2str(k),'_size_histogram_triangle','.png']);
    saveas(1,name_hist_tri);
    close all;
endif
if num_total(4) ~= 0
    [cnt_und,center_und]=hist(sizeA_und,3);
    figure
    bar(center_und,cnt_und,'FaceColor','r','EdgeColor','k','LineWidth',2,"hist");
    xlabel('Area [ $\mu\text{m}^2$ ]');
    ylabel ('Particles');
    name_hist_und=sprintf(['picture_',num2str(mag),'_',num2str(k),'_size_histogram_undecided','.png']);
    saveas(1,name_hist_und);
    close all;
endif

```

```

endif

case{20}
sizeA_metric=((3000/472)^2)*sizeA;
maxparticle=max(sizeA_metric);
[count,bincenter]=hist(sizeA_metric,5);
figure
bar(bincenter,count,'FaceColor','r','EdgeColor','k','LineWidth',2,'hist');
xlabel('Area [ $\mu\text{m}^2$ ]');
ylabel('Particles');
name_hist=sprintf(['picture_',num2str(mag),'_',num2str(k),'_size_histogram','.png']);
saveas(1,name_hist);
close all;

%%Global size statistics generation
%First image
if length_part_old==0
    size_out=sizeA_metric;
    length_part_old=num_regions;
%Subsequent images
else
    %Save prior particle sizes in help array
    size_old=size_out;
    %Determine length of the new size output array
    length_part_new=length_part_old+num_regions;
    size_out=zeros(1,length_part_new);
    for i=1:length_part_old
        %Save old particle sizes in new array
        size_out(i)=size_old(i);
    endfor
    for i=(length_part_old+1):(length_part_new)
        %Add particle sizes from current image
        size_out(i)=sizeA_metric(i-length_part_old);
    endfor
    %Adjust the length of the array required to save the particle sizes
    length_part_old=length(size_out);
end

if single_image_shape==1
    %Histogram for shape specific subplots
    sizeA_ell=zeros(1,num_total(1));
    sizeA_rec=zeros(1,num_total(2));
    sizeA_tri=zeros(1,num_total(3));
    sizeA_und=zeros(1,num_total(4));

```

```

m=n=o=p=1;
for i=1:num_regions
    if num_ell(i)==1
        sizeA_ell(m)=sizeA_metric(i);
        m++;
    endif
    if num_rec(i)==1
        sizeA_rec(n)=sizeA_metric(i);
        n++;
    endif
    if num_tri(i)==1
        sizeA_tri(o)=sizeA_metric(i);
        o++;
    endif
    if num_und(i)==1
        sizeA_und(p)=sizeA_metric(i);
        p++;
    endif
endfor

if num_total(1) ~= 0
    [cnt_ell,center_ell]=hist(sizeA_ell,3);
    figure
    bar(center_ell,cnt_ell,'FaceColor','r','EdgeColor','k','LineWidth',2,"hist");
    xlabel('Area [ $\mu\text{m}^2$ ]');
    ylabel('Particles');
    name_hist_ell=sprintf(['picture_',num2str(mag),'_',num2str(k),'_size_histogram_ellipse','.png']);
    saveas(1,name_hist_ell);
    close all;
endif

if num_total(2) ~= 0
    [cnt_rec,center_rec]=hist(sizeA_rec,3);
    figure
    bar(center_rec,cnt_rec,'FaceColor','r','EdgeColor','k','LineWidth',2,"hist");
    xlabel('Area [ $\mu\text{m}^2$ ]');
    ylabel('Particles');
    name_hist_rec=sprintf(['picture_',num2str(mag),'_',num2str(k),'_size_histogram_rectangle','.png']);
    saveas(1,name_hist_rec);
    close all;
endif

if num_total(3) ~= 0
    [cnt_tri,center_tri]=hist(sizeA_tri,3);
    figure
    bar(center_tri,cnt_tri,'FaceColor','r','EdgeColor','k','LineWidth',2,"hist");

```



```

xlabel('Area [ $\mu\text{m}^2$ ']);
ylabel('Particles');
name_hist_tri=sprintf(['picture_',num2str(mag),'_',num2str(k),'_size_histogram_triangle','.png']);
saveas(1,name_hist_tri);
close all;
endif
if num_total(4) ~= 0
    [cnt_und,center_und]=hist(sizeA_und,3);
    figure
    bar(center_und,cnt_und,'FaceColor','r','EdgeColor','k','LineWidth',2,"hist");
    xlabel('Area [ $\mu\text{m}^2$ ']);
    ylabel('Particles');
    name_hist_und=sprintf(['picture_',num2str(mag),'_',num2str(k),'_size_histogram_undecided','.png']);
    saveas(1,name_hist_und);
    close all;
endif

endif

otherwise
    printf("Area calculation isn't yet implemented for the selected magnification. Please redo with supported magnification or add
code for the required magnification by calculating area of 1px");
endswitch

## %Saving the B/W image of particle area and the perimeter of the particles superimposed on top of the original image
name_img=sprintf(['picture_',num2str(mag),'_',num2str(k),'_png']);
imwrite(img_clear4,name_img);
name_overlay=sprintf(['picture_',num2str(mag),'_',num2str(k),'_overlay','.png']);
imwrite(img_overlay,name_overlay);

endfor

%%Returning graphs containing information about particle size distribution over a series of images
[count_size_global,bincenter_size_global]=hist(size_out,40);
figure
bar(bincenter_size_global,count_size_global,'FaceColor','r',"hist");
xlabel('Area [ $\mu\text{m}^2$ ']);
ylabel('Count');
name_hist_size_global=sprintf(['picture_',num2str(mag),'_size_global','.png']);
saveas(1,name_hist_size_global);
close all;
csvwrite("size_global.csv",reshape(size_out,length_part_old,1));

%%The following function returns global statistics on shape parameters provided it is enabled

```

```

if (length_old > 0)
[count_sol_global,bincenter_sol_global]=hist(sol_out,20);
figure
bar(bincenter_sol_global,count_sol_global,'FaceColor','r','hist');
xlabel('Solidity A_{Particle}/A_{Convexhull}');
ylabel('Count');
name_hist_solidity_global=sprintf(['picture_',num2str(mag),'_solidity_global','.png']);
saveas(1,name_hist_solidity_global);
close all;
csvwrite("solidity_global.csv",reshape(sol_out,length_part_old,1));

[count_cvx_global,bincenter_cvx_global]=hist(cvx_out,20);
figure
bar(bincenter_cvx_global,count_cvx_global,'FaceColor','r','hist');
xlabel('Convexity P_{Convexhull}/P_{Particle}');
ylabel('Count');
name_hist_convexity_global=sprintf(['picture_',num2str(mag),'_convexity_global','.png']);
saveas(1,name_hist_convexity_global);
close all;
csvwrite("convexity_global.csv",reshape(cvx_out,length_part_old,1));

[count_rar_global,bincenter_rar_global]=hist(rar_out,20);
figure
bar(bincenter_rar_global,count_rar_global,'FaceColor','r','hist');
xlabel('Reciprocal aspect ratio length(fitted minor axis)/length(fitted major axis)');
ylabel('Count');
name_hist_rar_global=sprintf(['picture_',num2str(mag),'_rar_global','.png']);
saveas(1,name_hist_rar_global);
close all;
csvwrite("reciprocalaspectratio_global.csv",reshape(rar_out,length_part_old,1));

[count_fmr_global,bincenter_fmr_global]=hist(fmr_out,20);
figure
bar(bincenter_fmr_global,count_fmr_global,'FaceColor','r','hist');
xlabel('Feret major axis ratio length(feret major axis)/length(fitted major axis)');
ylabel('Count');
name_hist_fmr_global=sprintf(['picture_',num2str(mag),'_fmr_global','.png']);
saveas(1,name_hist_fmr_global);
close all;
csvwrite("feretmajoraxisratio_global.csv",reshape(fmr_out,length_part_old,1));
endif

```

## SI2: Global thresholding versus edge detection

Large particles split in multiple, inaccurate small particles for global thresholding (Figure S1a) and yielded better results using edge detection (Figure S1b).

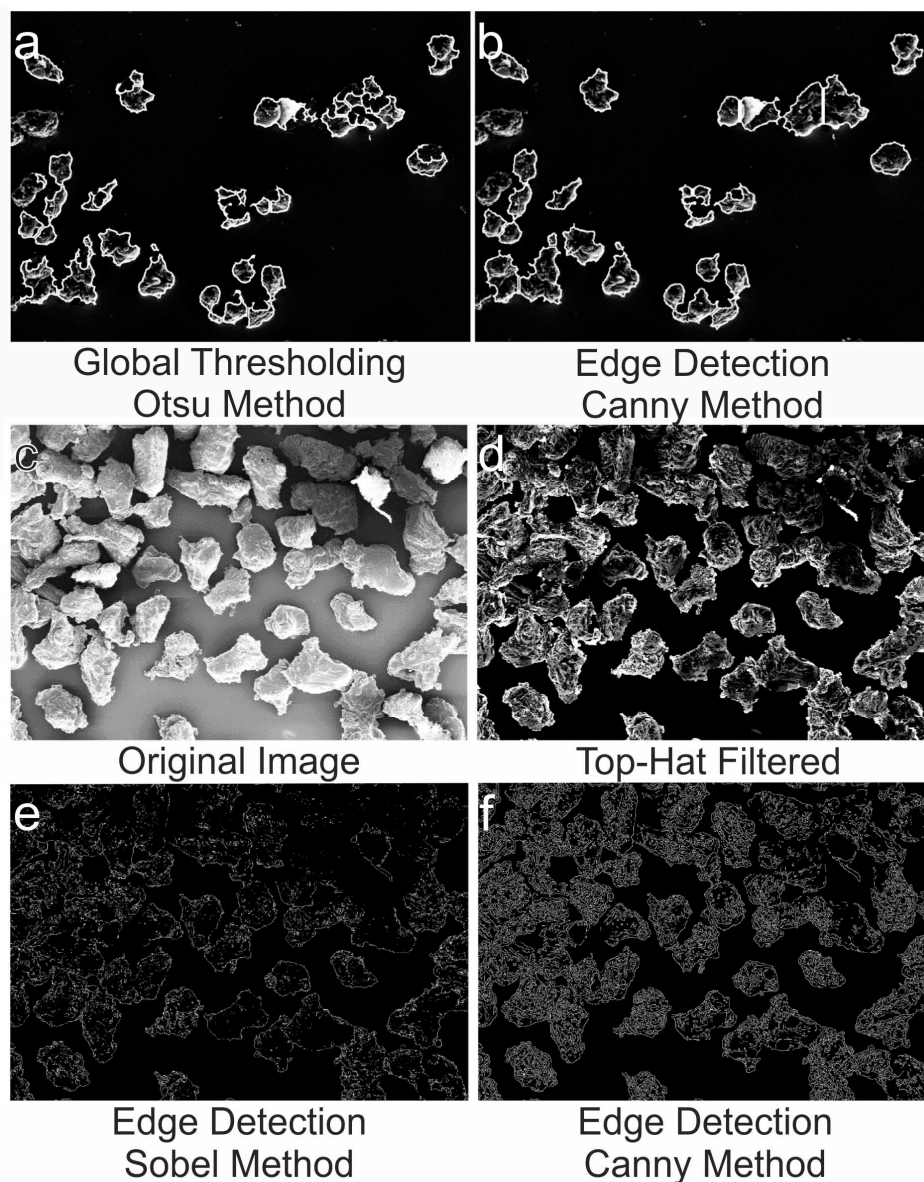

**Figure S1:** Original SEM-image (c), top-hat-filtered and histogram-stretched (d), after Sobel edge detection (e) and after Canny edge detection (f).

A comparison between the two edge detection methods *Sobel* and *Canny* shows that no method is a clear winner. *Canny* detected more edges in areas of high and medium contrast (Figure S1f), while *Sobel* can completely miss darker objects near a bright object (Figure S1e). The edges identified by *Canny* were generally not closed and require further DIP steps for their closure (see Article, Figure 2g-i).

### SI3: Evaluation of “best” setting

Under the specified settings (Table S2, Table S3: columns 1-3), a manual count of all incorrectly detected particles of two pilot images (Figure 7g,h) was performed to find the “best” setting for running an image series. The high number of settings were narrowed down to 13 respectable settings (Table S1, Table S2) and the first four were tested on an image series. LDPE 1.4 are particles of the sieve fraction 200-300  $\mu\text{m}$  (measuring bar 1 mm) and LDPE 1.8 of the fraction 50-100  $\mu\text{m}$  (0.6 mm).

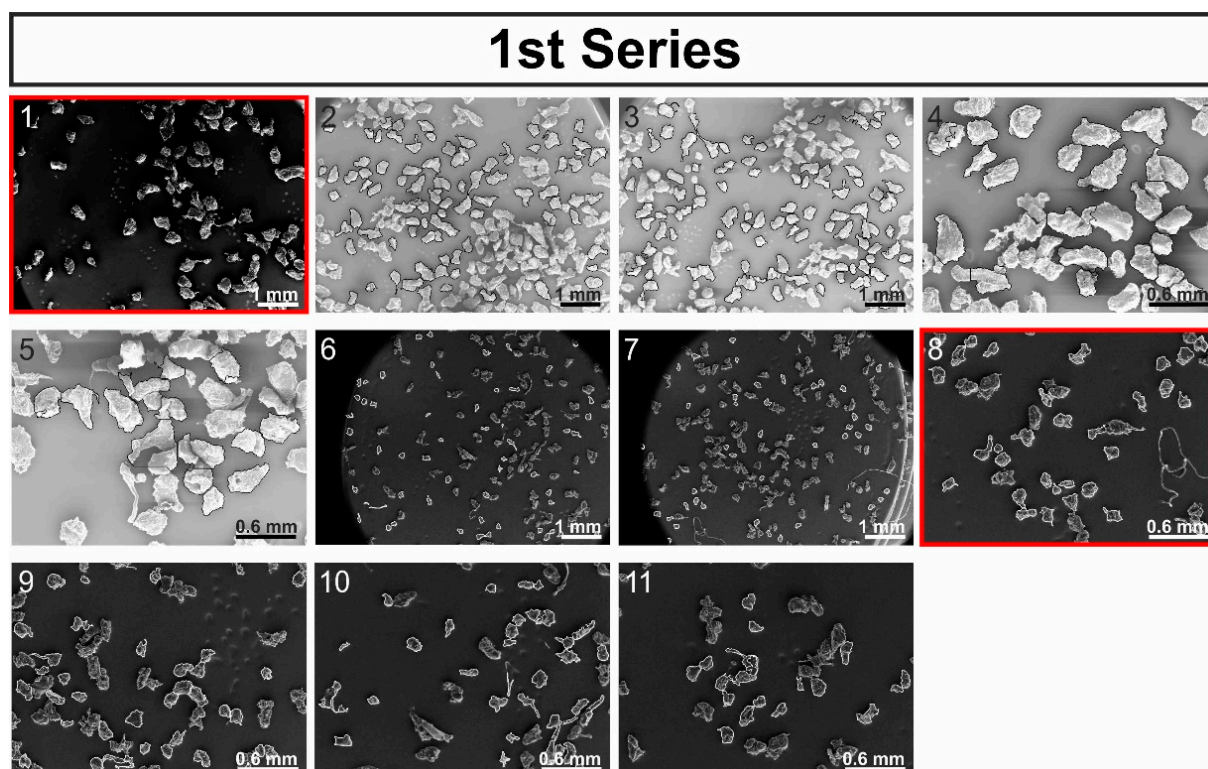

**Figure S2:** Overlay of input and output images of the 1st image series tested, LDPE particles of the sieve fraction 200-300  $\mu\text{m}$  (No. 1-5) and fraction 50-100  $\mu\text{m}$  (No. 6-11) with the two pilot images (No. 1+8, red framed) imaged in MAG 20x (1 mm) and MAG 50x (0.6 mm).

**Table S1:** Tested settings on the pilot image of fraction 200-300  $\mu\text{m}$  with MAG 20x.

| Structuring<br>element size<br>top-hat filter<br>[px] | Structuring<br>element size<br>edge-closing<br>[px] | Segmentation<br>threshold<br><i>height_th</i> | Total<br>particles | Detected<br>particles | Errors |
|-------------------------------------------------------|-----------------------------------------------------|-----------------------------------------------|--------------------|-----------------------|--------|
| 10                                                    | 4                                                   | 5                                             | 56                 | 46                    | 7      |
| 10                                                    | 4                                                   | 4                                             | 56                 | 48                    | 8      |
| 10                                                    | 6                                                   | 5                                             | 56                 | 42                    | 8      |
| 10                                                    | 6                                                   | 3                                             | 56                 | 46                    | 11     |
| 10                                                    | 5                                                   | 4                                             | 56                 | 46                    | 10     |
| 10                                                    | 6                                                   | 4                                             | 56                 | 43                    | 9      |
| 10                                                    | 5                                                   | 5                                             | 56                 | 44                    | 10     |
| 10                                                    | 5                                                   | 3                                             | 56                 | 48                    | 12     |
| 10                                                    | 4                                                   | 3                                             | 56                 | 50                    | 10     |
| 9                                                     | 4                                                   | 4                                             | 56                 | 47                    | 8      |
| 11                                                    | 4                                                   | 4                                             | 56                 | 49                    | 10     |
| 12                                                    | 4                                                   | 4                                             | 56                 | 51                    | 11     |
| 15                                                    | 4                                                   | 4                                             | 56                 | 49                    | 9      |

**Table S2:** Tested settings on the pilot image of fraction 50-100  $\mu\text{m}$  with MAG 50x.

| Structuring<br>element size<br>top-hat filter<br>[px] | Structuring<br>element size<br>edge-closing<br>[px] | Segmentation<br>threshold<br><i>height_th</i> | Total<br>particles | Detected<br>particles | Errors |
|-------------------------------------------------------|-----------------------------------------------------|-----------------------------------------------|--------------------|-----------------------|--------|
| 10                                                    | 4                                                   | 5                                             | 40                 | 30                    | 0      |
| 10                                                    | 4                                                   | 4                                             | 40                 | 30                    | 0      |
| 10                                                    | 6                                                   | 5                                             | 40                 | 30                    | 1      |
| 10                                                    | 6                                                   | 3                                             | 40                 | 34                    | 5      |
| 10                                                    | 5                                                   | 4                                             | 40                 | 30                    | 1      |
| 10                                                    | 6                                                   | 4                                             | 40                 | 31                    | 2      |
| 10                                                    | 5                                                   | 5                                             | 40                 | 30                    | 1      |
| 10                                                    | 5                                                   | 3                                             | 40                 | 35                    | 9      |
| 10                                                    | 4                                                   | 3                                             | 40                 | 35                    | 9      |
| 9                                                     | 4                                                   | 4                                             | 40                 | 29                    | 0      |
| 11                                                    | 4                                                   | 4                                             | 40                 | 29                    | 0      |
| 12                                                    | 4                                                   | 4                                             | 40                 | 30                    | 0      |
| 15                                                    | 4                                                   | 4                                             | 40                 | 31                    | 2      |

**Table S3:** Evaluated results using structuring element size 4, morphological closing and segmentation threshold 5.

| Identifier<br>(Magnification) | Total<br>particles | Identified<br>particles | Total<br>errors | Identification<br>ratio [%] | Error<br>ratio<br>[%] |
|-------------------------------|--------------------|-------------------------|-----------------|-----------------------------|-----------------------|
| LDPE1.4_1(20)                 | 56                 | 46                      | 7               | 82.1                        | 15.2                  |
| LDPE1.4_2(20)                 | 161                | 81                      | 16              | 50.3                        | 19.8                  |
| LDPE1.4_3(20)                 | 143                | 87                      | 18              | 60.8                        | 20.7                  |
| LDPE1.4_4(50)                 | 29                 | 21                      | 4               | 72.4                        | 19.0                  |
| LDPE1.4_5(50)                 | 27                 | 14                      | 6               | 51.9                        | 42.9                  |
| LDPE1.8_1(20)                 | 149                | 57                      | 6               | 38.3                        | 10.5                  |
| LDPE1.8_2(20)                 | 183                | 44                      | 5               | 24.0                        | 11.4                  |
| LDPE1.8_3(50)                 | 40                 | 30                      | 0               | 75.0                        | 0.0                   |
| LDPE1.8_4(50)                 | 58                 | 35                      | 4               | 60.3                        | 11.4                  |
| LDPE1.8_5(50)                 | 40                 | 38                      | 13              | 95.0                        | 34.2                  |
| LDPE1.8_6(50)                 | 33                 | 19                      | 2               | 57.6                        | 10.5                  |
| Sum                           | 919                | 472                     | 81              | 51.4                        | 17.2                  |

**Table S4:** Evaluated results using structuring element size 4, morphological closing and segmentation threshold 4.

| Identifier<br>(Magnification) | Total<br>particles | Identified<br>particles | Total<br>errors | Identification<br>ratio [%] | Error<br>ratio<br>[%] |
|-------------------------------|--------------------|-------------------------|-----------------|-----------------------------|-----------------------|
| LDPE1.4_1(20)                 | 56                 | 48                      | 8               | 85.7                        | 16.7                  |
| LDPE1.4_2(20)                 | 161                | 87                      | 21              | 54.0                        | 24.1                  |
| LDPE1.4_3(20)                 | 143                | 94                      | 21              | 65.7                        | 22.3                  |
| LDPE1.4_4(50)                 | 29                 | 21                      | 5               | 72.4                        | 23.8                  |
| LDPE1.4_5(50)                 | 27                 | 15                      | 6               | 55.6                        | 40.0                  |
| LDPE1.8_1(20)                 | 149                | 66                      | 8               | 44.3                        | 12.1                  |
| LDPE1.8_2(20)                 | 183                | 55                      | 5               | 30.1                        | 9.1                   |
| LDPE1.8_3(50)                 | 40                 | 30                      | 0               | 75.0                        | 0.0                   |
| LDPE1.8_4(50)                 | 58                 | 37                      | 4               | 63.8                        | 10.8                  |
| LDPE1.8_5(50)                 | 40                 | 40                      | 17              | 100.0                       | 42.5                  |
| LDPE1.8_6(50)                 | 33                 | 20                      | 2               | 60.6                        | 10.0                  |
| Sum                           | 919                | 513                     | 97              | 55.8                        | 18.9                  |



**Table S5:** Evaluated results using structuring element size 6, morphological closing and segmentation threshold 5.

| Identifier<br>(Magnification) | Total<br>particles | Identified<br>particles | Total<br>errors | Identification<br>ratio [%] | Error<br>ratio<br>[%] |
|-------------------------------|--------------------|-------------------------|-----------------|-----------------------------|-----------------------|
| LDPE1.4_1(20)                 | 56                 | 42                      | 8               | 75.0                        | 19.0                  |
| LDPE1.4_2(20)                 | 161                | 60                      | 12              | 37.3                        | 20.0                  |
| LDPE1.4_3(20)                 | 143                | 72                      | 19              | 50.3                        | 26.4                  |
| LDPE1.4_4(50)                 | 29                 | 23                      | 6               | 79.3                        | 26.1                  |
| LDPE1.4_5(50)                 | 27                 | 14                      | 6               | 51.9                        | 42.9                  |
| LDPE1.8_1(20)                 | 149                | 51                      | 6               | 34.2                        | 11.8                  |
| LDPE1.8_2(20)                 | 183                | 37                      | 3               | 20.2                        | 8.1                   |
| LDPE1.8_3(50)                 | 40                 | 30                      | 1               | 75.0                        | 3.3                   |
| LDPE1.8_4(50)                 | 58                 | 29                      | 4               | 50.0                        | 13.8                  |
| LDPE1.8_5(50)                 | 40                 | 33                      | 10              | 82.5                        | 30.3                  |
| LDPE1.8_6(50)                 | 33                 | 18                      | 1               | 54.5                        | 5.6                   |
| Sum                           | 919                | 409                     | 76              | 44.5                        | 18.6                  |

**Table S6:** Evaluated results using structuring element size 6, morphological closing and segmentation threshold 3.

| Identifier<br>(Magnification) | Total<br>particles | Identified<br>particles | Total<br>errors | Identification<br>ratio [%] | Error<br>ratio<br>[%] |
|-------------------------------|--------------------|-------------------------|-----------------|-----------------------------|-----------------------|
| LDPE1.4_1(20)                 | 56                 | 46                      | 11              | 82.1                        | 23.9                  |
| LDPE1.4_2(20)                 | 161                | 72                      | 23              | 44.7                        | 31.9                  |
| LDPE1.4_3(20)                 | 143                | 85                      | 24              | 59.4                        | 28.2                  |
| LDPE1.4_4(50)                 | 29                 | 24                      | 8               | 82.8                        | 33.3                  |
| LDPE1.4_5(50)                 | 27                 | 15                      | 6               | 55.6                        | 40.0                  |
| LDPE1.8_1(20)                 | 149                | 65                      | 10              | 43.6                        | 15.4                  |
| LDPE1.8_2(20)                 | 183                | 54                      | 6               | 29.5                        | 11.1                  |
| LDPE1.8_3(50)                 | 40                 | 34                      | 5               | 85.0                        | 14.7                  |
| LDPE1.8_4(50)                 | 58                 | 40                      | 5               | 69.0                        | 12.5                  |
| LDPE1.8_5(50)                 | 40                 | 43                      | 19              | 107.5                       | 44.2                  |
| LDPE1.8_6(50)                 | 33                 | 20                      | 3               | 60.6                        | 15.0                  |
| Sum                           | 919                | 498                     | 120             | 54.2                        | 24.1                  |

#### SI4: Influences of magnification changes

Size measurements of the LDPE particles (No. 1-27) counted in the SEM images (Figure 8) and the determination of the deviation from the magnifications (MAG 50x/110x) to baseline (MAG 20x) are presented in Table S7.

**Table S7:** Measurement values of magnification (MAG) compatibility analysis.

| Particle identifier | Measured particle area [ $\mu\text{m}^2$ ] |        |         | Deviation to baseline [%] |
|---------------------|--------------------------------------------|--------|---------|---------------------------|
|                     | MAG 20 (baseline)                          | MAG 50 | MAG 110 |                           |
| 1                   | 34009                                      | -      | 27695   | -18.6                     |
| 2                   | 17881                                      | -      | 14557   | -18.6                     |
| 3                   | 10440                                      | -      | 7187    | -31.2                     |
| 4                   | 30981                                      | -      | 21919   | -29.3                     |
| 5                   | 13128                                      | -      | 12114   | -7.7                      |
| 6                   | 23144                                      | -      | 19722   | -14.8                     |
| 7                   | 13185                                      | -      | 9935    | -24.6                     |
| 8                   | 14345                                      | -      | 11048   | -23.0                     |
| 9                   | 46260                                      | -      | 35652   | -22.9                     |
| 10                  | 15109                                      | -      | 11146   | -26.2                     |
| 11                  | 30585                                      | -      | 23853   | -22.0                     |
| 12                  | 34603                                      | -      | 23125   | -33.2                     |
| 13                  | 36131                                      | -      | 29882   | -17.3                     |
| 14                  | 21248                                      | -      | 16279   | -23.4                     |
| 15                  | 24247                                      | 23553  | -       | -2.9                      |
| 16                  | 16410                                      | 15606  | -       | -4.9                      |
| 17                  | 15816                                      | 15570  | -       | -1.6                      |
| 18                  | 15618                                      | 15196  | -       | -2.7                      |
| 19                  | 19890                                      | 20170  | -       | +1.4                      |

|    |       |        |   |       |
|----|-------|--------|---|-------|
| 20 | 16071 | 13965  | - | -13.1 |
| 21 | 27133 | 20763  | - | -23.5 |
| 22 | 13383 | 10783  | - | -19.4 |
| 23 | 16495 | 11822  | - | -28.3 |
| 24 | 28435 | 21561  | - | -24.2 |
| 25 | 13637 | 9674.6 | - | -29.1 |
| 26 | 25492 | 19819  | - | -22.3 |
| 27 | 13949 | 10559  | - | -24.3 |

## SI5: Second image series

Figure S3 shows the analyzed SEM images of the LDPE particles used for determination of the particle size distributions (Figure 10a). The images of 2<sup>nd</sup> series in Figure S4 and Figure S5 were used to classify the shape. The shape distributions of all combined sieve fractions of both batches ( $< 300 \mu\text{m}$  and  $< 800 \mu\text{m}$ ) can be seen in Figure 10c-h. The 2<sup>nd</sup> series of the LDPE particles in Figure S5 were visually inspected after the full-automatic analysis and misidentified particles were counted.

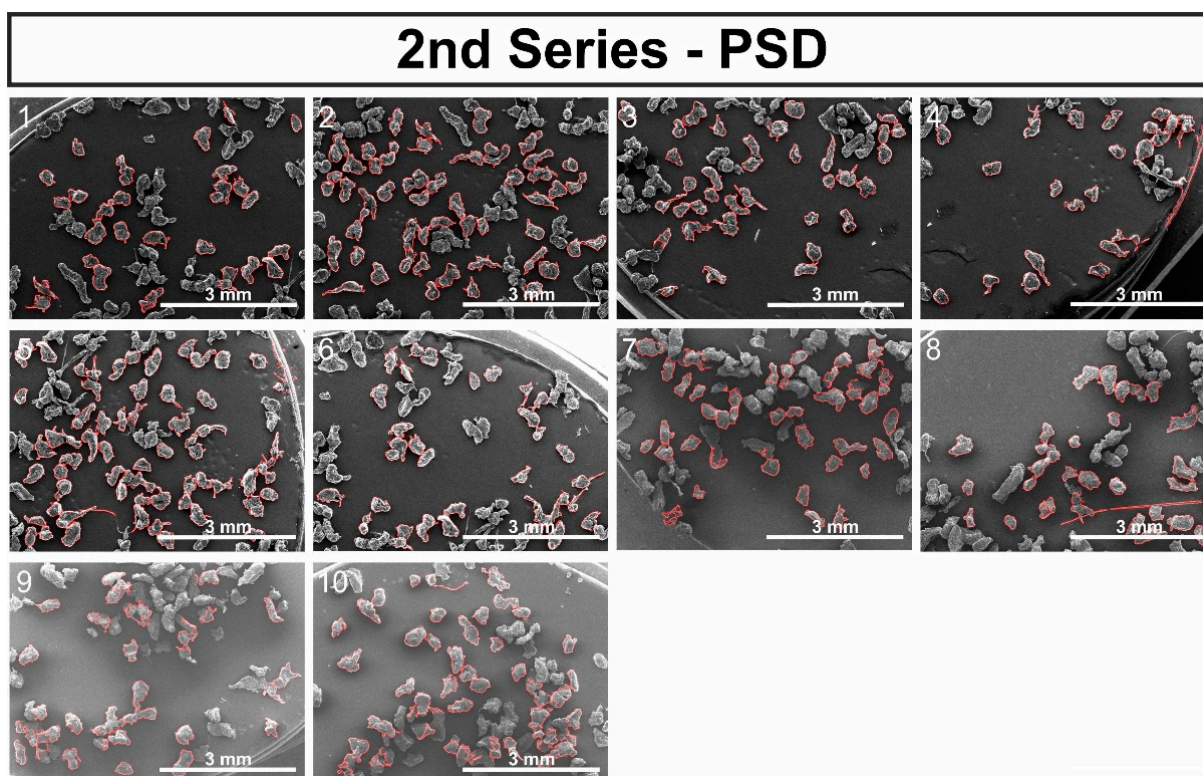

**Figure S3:** SEM images (No. 1-10) with detected LDPE particles (200-300  $\mu\text{m}$ , red outlined) of 2<sup>nd</sup> series used for PSD analysis.

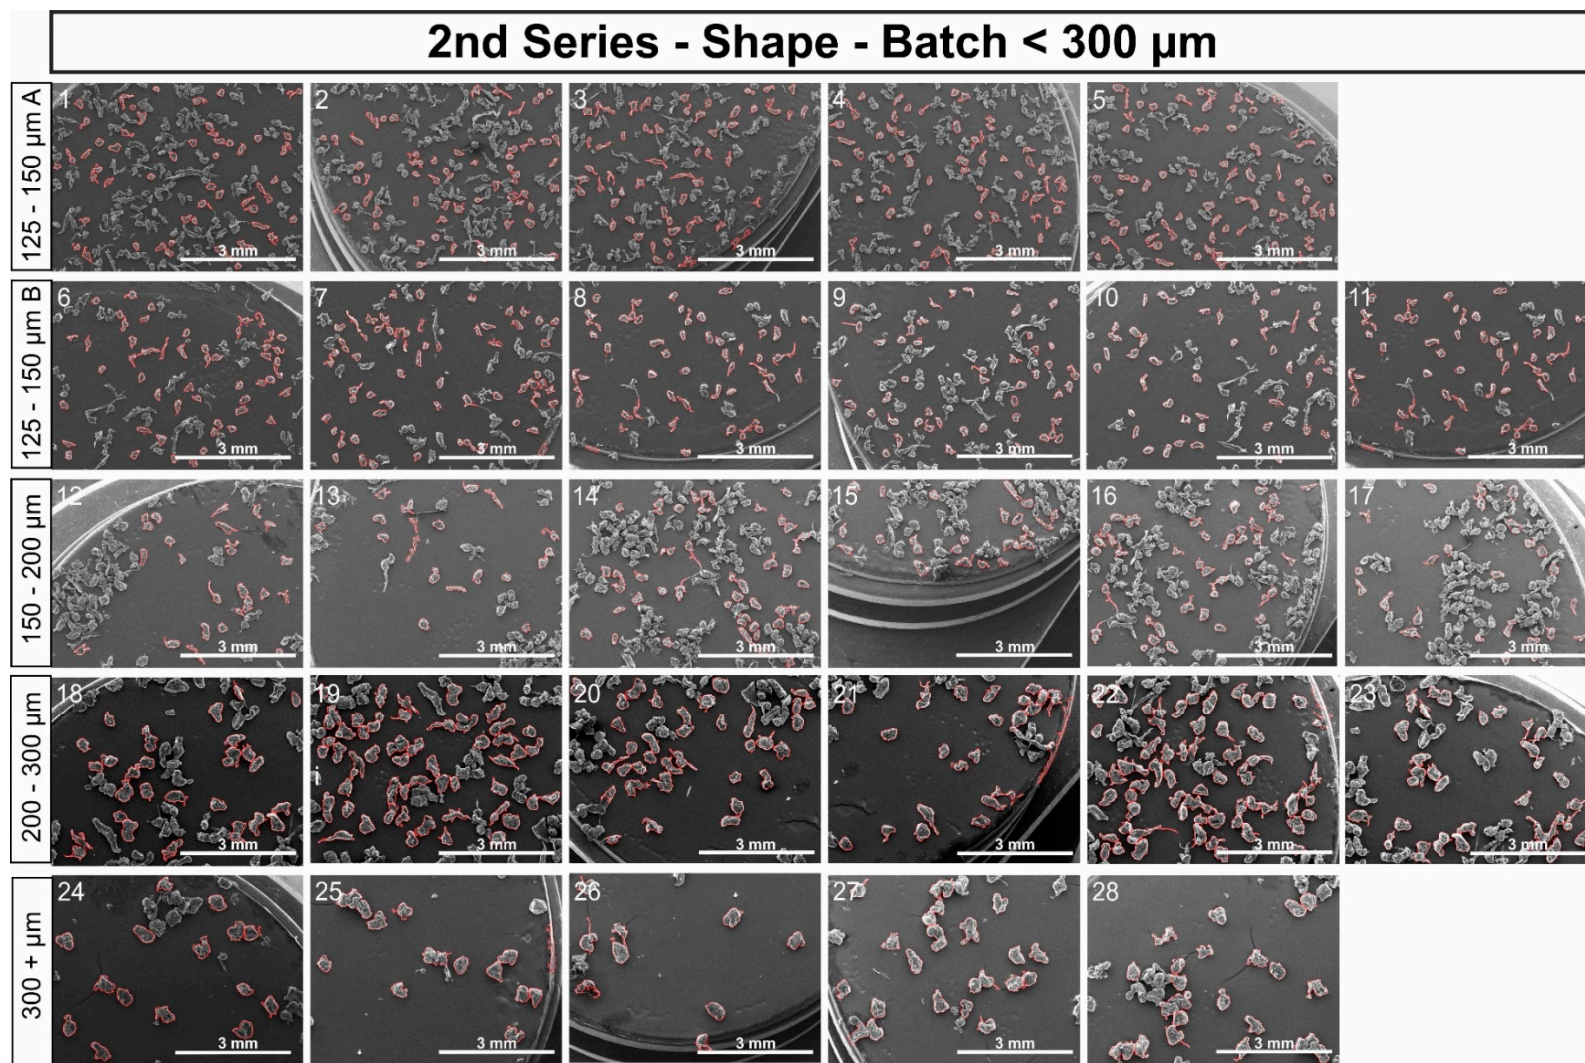

**Figure S4:** SEM images (No. 1-28) with detected particles (red outlined) of 2<sup>nd</sup> series from the batch smaller 300  $\mu\text{m}$  used for shape classification.



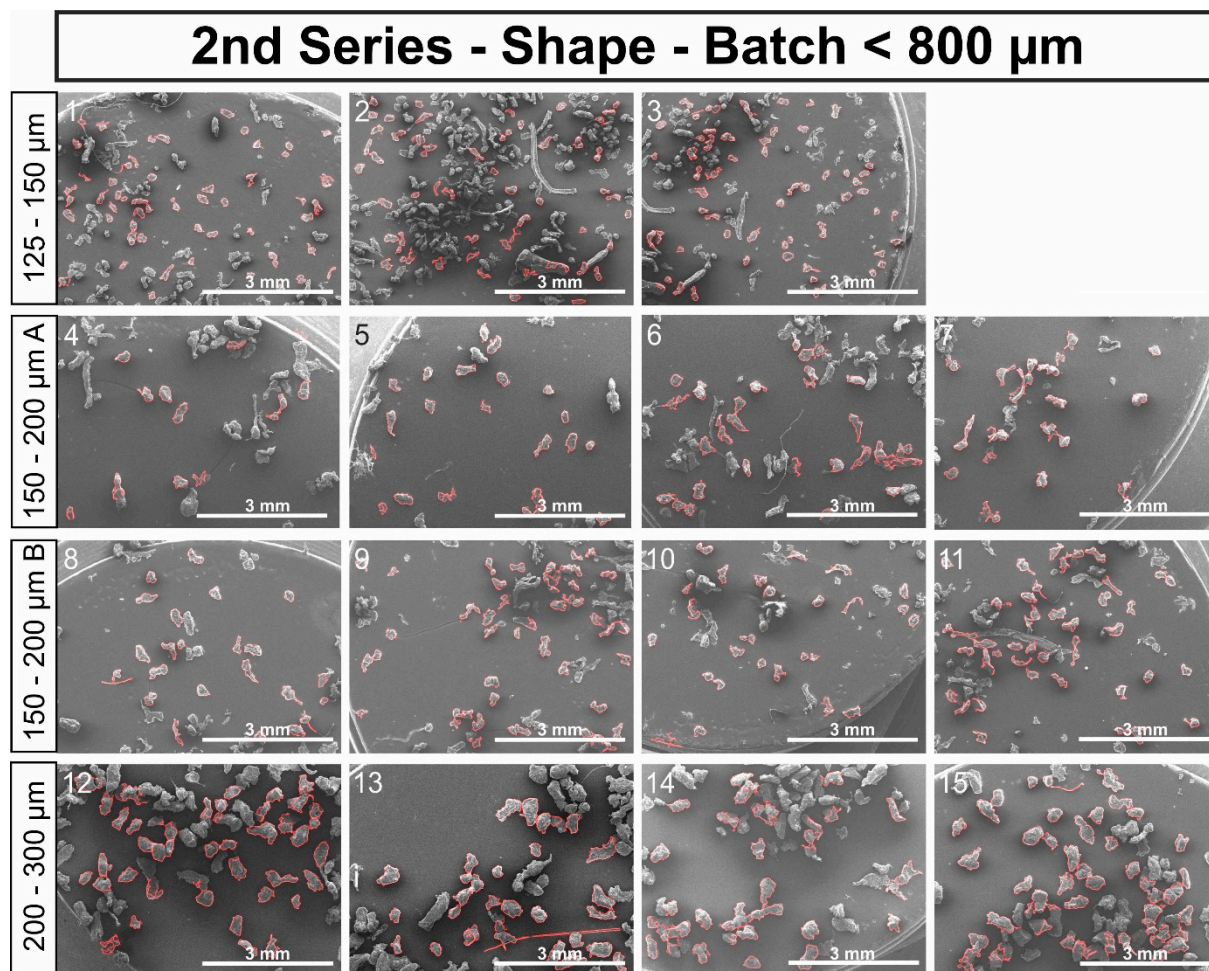

**Figure S5:** SEM images (No. 1-15) with detected particles (red outlined) of 2<sup>nd</sup> series from the batch smaller 800  $\mu\text{m}$  used for shape analysis.
